# Supplementary material for: Evolution of the miR-290–295/miR-371–373 Cluster Family Seed Repertoire
Source: PLoS One. 2014 Sep 30;9(9):e108519. doi: 10.1371/journal.pone.0108519 (PMC4182485; doi:10.1371/journal.pone.0108519)
Supplement: Dataset S3 — Supplementary Luciferase Assays Raw Data. (XLSX) [file pone.0108519.s008.xlsx]

## Sheet: 5B
SWJ 21	FF	RL	FF/RL	Average	STD	N Average	N STD
1C8C/292-iso1-1C 4mer	2855217	2813347	1.0149	0.923232	0.092468	0.422294	0.0422956
1C8C/292-iso1-1C 4mer	4005948	3901701	1.0267
1C8C/292-iso1-1C 4mer	3636565	3802136	0.9565
			0.79319									SWG 54	FF	RL	FF/RL		Average	STD	N Average	N STD
		2.45038	0.8939									292-iso1-1C (1C8C) 4mer	82363312	254480672	0.3237	0.79319	0.3457	0.0207029	0.387469	0.0232043
	SWG 54		0.854204									292-iso1-1C (1C8C) 4mer	104274128	285826976	0.3648	0.8939
292-iso1-1,2C 4mer			1.52389	1.4592	0.0660791	0.667451	0.0302251					292-iso1-1C (1C8C) 4mer	67588288	193898080	0.3486	0.854204
292-iso1-1,2C 4mer			1.4619									292-iso1-1,2C 4mer	179109760	287982624	0.6219	1.52389	0.5955	0.0269668	0.667451	0.0302251
292-iso1-1,2C 4mer			1.39182									292-iso1-1,2C 4mer	203426368	340970656	0.5966	1.4619
1C8T/294-1C 4mer	2332380	4541942	0.5135	0.541985	0.13436	0.247908	0.0614572					292-iso1-1,2C 4mer	196234608	345470304	0.568	1.39182
1C8T/294-1C 4mer	2561505	4089101	0.6264									Luciferase	391693120	450607616	0.8693	2.13012	0.8922	0.0432633	1	0.0484905
1C8T/294-1C 4mer	2068	2094	0.9877									Luciferase	353389984	408456096	0.8652	2.12007
			0.620901									Luciferase	279621056	296807200	0.9421	2.30851
	SWG 94	2.22306	0.724274														2.45038
			0.652913									292-iso1-1C (1C8C) 4mer	132125888	235079888	0.562	0.901855	0.5757	0.011895	0.935692	0.019333
			0.445815									292-iso1-1C (1C8C) 4mer	85194488	146455344	0.5817	0.933468
	SWJ 34	1.64568	0.341808									292-iso1-1C (1C8C) 4mer	108652800	186256288	0.5834	0.936196
			0.410268									292-iso1-1,2C 4mer	70719152	159866416	0.4424	0.70993	0.502833	0.070779	0.817261	0.115038
294 1,2C 4mer			1.64529	1.82313	0.184597	0.833914	0.0844359					292-iso1-1,2C 4mer	72272928	148882208	0.4854	0.778933
294 1,2C 4mer	SWG 94	2.22306	1.89294									292-iso1-1,2C 4mer	88117920	151733536	0.5807	0.931863
294 1,2C 4mer			2.08923									Luciferase	75199952	134298352	0.5599	0.898485	0.615267	0.0537775	1	0.0874052
			1.96078									Luciferase	94158384	141112768	0.6673	1.07083
	SWJ 40A	1.57606	1.68938									Luciferase	90663064	146552592	0.6186	0.992682
			1.66117														1.60472
1C8G 4mer	8656026	4710773	1.8375	1.85723	0.0172436	0.849513	0.00788738
1C8G 4mer	7650761	4092731	1.8694
1C8G 4mer	9063369	4860205	1.8648
1C8A 4mer	7193906	3481275	2.0665	2.1771	0.0965817	0.995822	0.0441772
1C8A 4mer	10468918	4715662	2.22									SWG 94
1C8A 4mer	9981984	4446788	2.2448									294 1C 4mer	1389907	4975936	0.2793	0.620901	0.2996	0.0238048	0.304647	0.0242058
No site	10152627	5140785	1.9749	2.18623	0.243017	1	0.111158					294 1C 4mer	1607394	4934155	0.3258	0.724274
No site	11482757	4951107	2.3192									294 1C 4mer	1210690	4121572	0.2937	0.652913
No site	11943126	5273749	2.2646									294 1,2C 4mer	2955350	3993129	0.7401	1.64529	0.8438	0.100072	0.858014	0.101758
			2.13012									294 1,2C 4mer	4066742	4775973	0.8515	1.89294
		2.45038	2.12007									294 1,2C 4mer	5152691	5482645	0.9398	2.08923
	SWG 54		2.30851									Luciferase	3159288	3569644	0.885	1.96741	0.983433	0.194434	1	0.197709
			1.96741									Luciferase	1699885	1407875	1.2074	2.68413
	SWG 94	2.22306	2.68413									Luciferase	881793	1027814	0.8579	1.90716
			1.90716															2.22306
			2.13823									294 1C 4mer	902880	1450656	0.6224	0.952689	0.572067	0.0454023	0.886879	0.0703876
	SWJ 34	1.64568	2.55722									294 1C 4mer	893161	1671810	0.5342	0.817684
			1.86324									294 1C 4mer	1009161	1803321	0.5596	0.856563
												294 1,2C 4mer	577666	1099365	0.5255	0.804367	0.539633	0.0136756	0.836598	0.0212015
	SWJ 40A	1.57606	2.01468									294 1,2C 4mer	917791	1697698	0.5406	0.82748
			2.35779									294 1,2C 4mer	840712	1520885	0.5528	0.846155
												Luciferase	712082	972558	0.7322	1.12076	0.645033	0.0760902	1	0.117963
												Luciferase	645164	1055882	0.611	0.93524
												Luciferase	436992	738227	0.5919	0.906004
1C8C/292-iso1-1C 4mer	2802645	3065376	0.9143	0.894303	0.0442924	0.905776	0.0448607											1.53067
1C8C/292-iso1-1C 4mer	3061466	3684694	0.8309
1C8C/292-iso1-1C 4mer	3118719	3672771	0.8491									SWJ 34	FF	RL	FF/RL		Average	STD	N Average	N STD
			0.901855									1C9T	1545566	5705430	0.2709	0.445815	0.242633	0.0321231	0.182642	0.0241806
		1.60472	0.933468									1C9T	2037273	9806433	0.2077	0.341808
	SWG 54		0.936196									1C9T	2551783	10234320	0.2493	0.410268
292-iso1-1,2C 4mer			0.70993	0.806909	0.113581	0.817261	0.115038					No site	18000300	13853965	1.2993	2.13823	1.32847	0.212358	1	0.159852
292-iso1-1,2C 4mer			0.778933									No site	20267752	13042776	1.5539	2.55722
292-iso1-1,2C 4mer			0.931863									No site	17323136	15299958	1.1322	1.86324
1C8T/294-1C 4mer	3759246	4605416	0.8163	0.813597	0.0715256	0.824035	0.0724432											1.64568
1C8T/294-1C 4mer	3245695	3942726	0.8232									1C9T	3171969	3003052	1.0562	0.722326	1.09293	0.0383401	0.757036	0.0265568
1C8T/294-1C 4mer	3684710	2046	1800									1C9T	3379022	3100238	1.0899	0.745373
			0.952689									1C9T	4324126	3817424	1.1327	0.774643
	SWG 94	2.22306	0.817684									No site	4291821	3236688	1.326	0.906839	1.4437	0.108219	1	0.0749593
			0.856563									No site	3631144	2359562	1.5389	1.05244
			0.722326									No site	4398019	2999629	1.4662	1.00272		0.683891
	SWJ 34	0.683891	0.745373
			0.774643
294 1,2C 4mer			0.804367	0.890534	0.112238	0.901959	0.113678
294 1,2C 4mer	SWG 94	2.22306	0.82748									SWJ 40A
294 1,2C 4mer			0.846155									1C2C9T - 1	15649186	12579033	1.2441	1.96078	1.12333	0.104969	0.809814	0.0756726
			1.08294									1C2C9T - 1	14920889	13920502	1.0719	1.68938
	SWJ 40A	0.693523	0.891731									1C2C9T - 1	12521390	11879563	1.054	1.66117
												No site	10916272	5241878	’2.0825		1.38715	0.153937	1	0.110974
1C8G 4mer	3877326	4625864	0.8382	0.7701	0.0604029	0.77998	0.0611778					No site	19080006	14926509	1.2783	2.01468
1C8G 4mer	3470413	4632743	0.7491									No site	14414875	9635908	1.496	2.35779
1C8G 4mer	2990560	4136539	0.723															1.57606
1C8A 4mer	3533298	3414222	1.0349	1.03607	0.00662747	1.04936	0.00671249					1C2C9T - 1	5651261	5254991	1.0754	0.745814	1.12507	0.112636	0.790269	0.0791178
1C8A 4mer	4658575	4465706	1.0432									1C2C9T - 1	5062377	4036940	1.254	0.869677
1C8A 4mer	3201012	3107372	1.0301									1C2C9T - 1	4136021	3954940	1.0458	0.725286
No site	3343709	3551061	0.9416	0.987333	0.0766899	1	0.0776737					No site	5333689	3415803	1.5615	1.08294	1.42365	0.194949	1	0.136936
No site	3398075	3474140	0.9781									No site	5134473	3993093	1.2858	0.891731
No site	3548544	3404488	1.0423									No site	2619703	1355246	‘1.933
			0.898485															0.693523
		1.60472	1.07083
	SWG 54		0.992682
			1.12076
	SWG 94	2.22306	0.93524
			0.906004
			0.906839										WT ES cells	KO ES cells
	SWJ 34	0.683891	1.05244				2-7C-S	0.422294	0.0422956			2-7C-S	0.422294	0.905776
			1.00272				3-7C-S	0.667451	0.0302251			3-7C-S	0.667451	0.817261
			1.08294				2-7U-S	0.247908	0.0614572			2-7U-S	0.247908	0.824035
	SWJ 40A	0.693523	0.891731				3-7U-S	0.833914	0.0844359			3-7U-S	0.833914	0.901959
							2-7G-S	0.849513	0.00788738			2-7G-S	0.849513	0.77998
							2-7A-S	0.995822	0.0441772			2-7A-S	0.995822	1.04936
							No site	1	0.111158			No site	1	1
							2-7C-S	0.905776	0.0448607
							3-7C-S	0.817261	0.115038
							2-7U-S	0.824035	0.0724432
							3-7U-S	0.901959	0.113678
							2-7G-S	0.77998	0.0611778
							2-7A-S	1.04936	0.00671249
							No site	1	0.0776737

## Sheet: 5C
Rescues	Targets	FF	RL	FF/RL	Average	STD	N Average	N STD							SWJ 52		FF	RL	FF/RL		SWJ 55		FF	RL	FF/RL
+miR-292	292-iso1-1C 4mer	553667	1025952	0.5397	0.651173	0.0714678	0.462877	0.0508018							+Δ292, 1:100	292-iso2-1C bulge	2278008	3645732	0.6248		+miR-292	292-iso2-1C bulge	447117	3758684	0.119
	292-iso1-1C 4mer	858255	1437516	0.597												292-iso2-1C bulge	2746286	4145550	0.6625			292-iso2-1C bulge	881552	7313577	0.1205
	292-iso1-1C 4mer	1061256	1500947	0.7071												292-iso2-1C bulge	3423223	5308068	0.6449			292-iso2-1C bulge	555266	4171338	0.1331
				0.643853												No site	4092898	5487723	0.7458			292-iso2-1,2C bulge	1674578	4831776	0.3466
	From SWJ 52		0.344023	0.701116												No site	4079325	5118763	0.7969			292-iso2-1,2C bulge	1598801	5154529	0.3102
				0.718266												No site	3398690	5007043	0.6788			292-iso2-1,2C bulge	1349384	3561214	0.3789
	292-iso1-1,2C 4mer	1721703	1738185	0.9905	1.16375	0.133029	0.827235	0.0945619							+Δ293, 1:100	292-iso2-1C bulge	1512106	4793076	0.3155			293-1C bulge	2503403	8853986	0.2827
	292-iso1-1,2C 4mer	1811972	1576828	1.1491												292-iso2-1C bulge	1855798	5780723	0.321			293-1C bulge	2429703	7832531	0.3102
	292-iso1-1,2C 4mer	1894189	1738647	1.0895												292-iso2-1C bulge	1841450	5453501	0.3377			293-1C bulge	1903276	5560107	0.3423
				0.987143987289211												No site	3367593	4278610	0.7871			293-1,2C bulge	4145323	8821790	0.4699
	From SWJ 52		0.344023	1.31329												No site	4288831	4264938	1.0056			293-1,2C bulge	3259252	7672606	0.4248
				1.27637												No site	3861831	4852403	0.7959			293-1,2C bulge	2163736	5260647	0.4113
	No site	2460831	1713473	1.4362	1.545	0.0875062	1.09824	0.0622025							+miR-290-295, 1:100	292-iso2-1C bulge	1381347	3440637	0.4015			292-3p perfect	1000422	8422409	0.1188
	No site	2454	2368	‘1.0364												292-iso2-1C bulge	1309588	3750274	0.3492			292-3p perfect	793616	5277560	0.1504
	No site	2570109	1647803	1.5597												292-iso2-1C bulge	1217798	2769010	0.4398			292-3p perfect	626834	4868542	0.1288
				1.64902												No site	2374552	4165099	0.5701			293-3p perfect	3141498	8198058	0.3832
	From SWJ 52		0.344023	1.81092669046283												No site	1614233	2486691	0.6491			293-3p perfect	3098278	7579454	0.4088
				1.53507												No site	2394843	2876598	0.8325			293-3p perfect	2378530	4983996	0.4772
+miR-293	292-iso1-1C			1.08148	1.13025	0.0991876	0.803425	0.070506							+Empty vector, 1:100	292-iso2-1C bulge	2883	3141	0.9178			No site	4253573	8554693	0.4972
From SWJ 55	292-iso1-1C			1.24439												292-iso2-1C bulge	2514	2639	0.9527			No site	4289432	8438675	0.5083
	292-iso1-1C			1.0649												292-iso2-1C bulge	2164	2275	0.9512			No site	3971484	7476662	0.5312
	292-iso1-1,2C			1.34128	1.31343	0.0756472	0.933631	0.0537727								No site	1235048	1550894	0.7963		+miR-293	292-iso1-1C	2601603	7821471	0.3326
0.307541	292-iso1-1,2C			1.2278												No site	1543059	2298680	0.6713			292-iso1-1C	3113912	8135903	0.3827
	292-iso1-1,2C			1.3712												No site	1526597	1788852	0.8534			292-iso1-1C	1857434	5671132	0.3275
	No site			1.69441	1.60092	0.132205	1.13799	0.0939763														292-iso1-1,2C	2368231	5741380	0.4125
	No site			1.50744																		292-iso1-1,2C	2202952	5834176	0.3776
	No site			2.10866031166216											SWJ 19		FF	RL	FF/RL			292-iso1-1,2C	2361756	5600187	0.4217
	292-iso1-1C 4mer			0.589098	0.506203	0.119356	0.359827	0.0848425							+Δ292, 1:100	292-iso1-1C 4mer	963151	2383957	0.404			No site	2926091	5615614	0.5211
+miR-294	292-iso1-1C 4mer			0.560109												292-iso1-1C 4mer	1243110	1563959	0.7948			No site	4261542	9192943	0.4636
From SWK 46	292-iso1-1C 4mer			0.369403												292-iso1-1C 4mer	1506931	3588243	0.42			No site	3338370	5147906	0.6485
	292-iso1-1,2C 4mer			0.971132	1.02317	0.0573151	0.727308	0.0407416								292-iso1-1,2C 4mer	2142871	3197050	0.6703		+Δ293	292-iso1-1C	1810236	10982731	0.1648
SWK 46 * 2.07064373064226	292-iso1-1,2C 4mer			1.0846						No site	No site average	NSA STD				292-iso1-1,2C 4mer	1964024	3227743	0.6085			292-iso1-1C	1287841	5740647	0.2243
	292-iso1-1,2C 4mer			1.01379						1.4362	1.4068	0.122117				292-iso1-1,2C 4mer	2267899	3493122	0.6492			292-iso1-1C	1896800	10809901	0.1755
	No site			1.38878	1.35876	0.0277273	0.965852	0.0197096		‘1.0364						294-3p perfect	310962	2187928	0.1421			292-iso1-1,2C	2015654	10456795	0.1928
	No site			1.33412						1.5597						294-3p perfect	345184	3796023	0.0909			292-iso1-1,2C	2250053	12979964	0.1733
	No site			1.35337						1.64902						294-3p perfect	348805	3387569	0.103			292-iso1-1,2C	1909121	13000364	0.1469
+Δ292	292-iso1-1C 4mer	1049530	1623431	0.6465	0.743311	0.104375	0.528372	0.0741931		1.81092669046283						No site	2518802	3224623	0.7811			No site	5322695	12739181	0.4178
	292-iso1-1C 4mer	1239686	1764910	0.7024						1.53507						No site	2383346	2982698	0.7991			No site	3724119	9033569	0.4123
	292-iso1-1C 4mer	1351928	2082612	0.6492						1.69441						No site	2776139	3834823	0.7239			No site
				0.714346						1.50744					+Empty vector, 1:100	292-iso1-1C 4mer	1596451	2406393	0.6634		+Δ292	293-1C bulge	1217859	20981432	0.058
	From SWJ 19		0.565552	1.40535234845467						2.10866031166216						292-iso1-1C 4mer	2331665	1803916	1.2926			293-1C bulge	599257	9448210	0.0634
				0.742637						1.5059						292-iso1-1C 4mer	1865322	2696905	0.6917			293-1C bulge	940268	13113778	0.0717
				0.885407						1.2152						292-iso1-1,2C 4mer	1824306	2681831	0.6802			No site	4752318	12140752	0.3914
	From SWJ 52		0.344023	0.684257						1.3307						292-iso1-1,2C 4mer	1710799	1938840	0.8824			No site	8136894	18987628	0.4285
				0.921741						1.38113						292-iso1-1,2C 4mer	1776169	2554850	0.6952			No site	9127293	20408522	0.4472
	292-iso1-1,2C 4mer	1677765	1600341	1.0484	1.09886	0.0820013	0.781106	0.0582894		1.41296						294-3p perfect	2041969	2925268	0.698		+Empty vector	292-iso2-1C bulge	4017986	9567895	0.4199
	292-iso1-1,2C 4mer	2024838	1884899	1.0742						1.27999						294-3p perfect	1996861	3120773	0.6399			292-iso2-1C bulge	4177069	10689169	0.3908
	292-iso1-1,2C 4mer	1702478	1706192	0.9978						1.26503						294-3p perfect	1808194	2805143	0.6446			292-iso2-1C bulge	4715617	12282413	0.3839
				1.18521						1.30079						No site	2544637	3051818	0.8338			292-iso2-1,2C bulge	3954902	9776124	0.4045
	From SWJ 19		0.565552	1.07594						1.40223						No site	2368768	2669571	0.8873			292-iso2-1,2C bulge	4331025	11205708	0.3865
				1.1479						1.35852						No site	2373994	3191952	0.7437			292-iso2-1,2C bulge	3186191	9151761	0.3482
				1.08074						1.34063					+miR-371, 1:100	292-iso1-1C 4mer	1933756	3242193	0.5964			293-1C bulge	3364878	12175887	0.2764
	From SWJ 52		0.344023	1.02493												292-iso1-1C 4mer	1939492	1640704	1.1821			293-1C bulge	3707248	12548092	0.2954
				1.25457						1.43106						292-iso1-1C 4mer	2099669	2906681	0.7224			293-1C bulge	4179924	13511561	0.3094
	No site	2254236	1496888	1.5059	1.34377	0.0899324	0.955199	0.0639271		1.60851						292-iso1-1,2C 4mer	3095036	4938785	0.6267			293-1,2C bulge	2693082	7550488	0.3567
	No site	2337475	1923517	1.2152						1.46818						292-iso1-1,2C 4mer	2530119	2935305	0.862			293-1,2C bulge	110016	432789	0.2542
	No site	2470845	1856762	1.3307						1.6243						292-iso1-1,2C 4mer	2911195	4342401	0.6704			293-1,2C bulge	4274875	14571197	0.2934
				1.38113						1.3753						No site	2642475	3589825	0.7361			292-iso1-1C	2724631	8731058	0.3121
	From SWJ 19		0.565552	1.41296						1.471						No site	2959769	4269972	0.6932			292-iso1-1C	3368115	9461003	0.356
				1.27999						1.21852						No site	2328222	2420565	0.9619			292-iso1-1C	3044208	8833776	0.3446
				1.26503						1.37113					+miR-372-373, 1:100	292-iso1-1C 4mer	1139958	2846426	0.4005			292-iso1-1,2C	2328427	7674948	0.3034
	From SWJ 52		0.344023	1.30079						1.40165						292-iso1-1C 4mer	1318036	1507855	0.8741			292-iso1-1,2C	3694462	10456935	0.3533
				1.40223						1.2239						292-iso1-1C 4mer	1689410	4507390	0.3748			292-iso1-1,2C	2703383	7863844	0.3438
+Δ293	292-iso1-1C			0.535863	0.59386	0.103134	0.422137	0.0733113		1.3373						292-iso1-1,2C 4mer	2280770	4308330	0.5294			292-3p perfect	3020448	9767200	0.3092
From SWJ 55	292-iso1-1C			0.729333						1.3797						292-iso1-1,2C 4mer	2842836	5244708	0.542			292-3p perfect	2860600	9342485	0.3062
0.307541	292-iso1-1C			0.570655						1.44675						292-iso1-1,2C 4mer	2288034	4314791	0.5303			292-3p perfect	2870593	8050070	0.3566
				0.596051						1.53958						No site	3489497	5371608	0.6496			293-3p perfect	3046132	9545938	0.3191
	From SWJ 57		0.59005	0.583171						1.29042						No site	3651335	4931118	0.7405			293-3p perfect	4194957	11677734	0.3592
				0.548089						1.47431						No site	2962319	3730464	0.7941			293-3p perfect	4224491	12316516	0.343
From SWJ 57	292-iso1-1,2C			0.947546	0.987091	0.0650027	0.701659	0.0462062		1.56891					+miR-371-373, 1:100	292-iso1-1C 4mer	1727467	3610154	0.4785			No site	3548590	8465197	0.4192
	292-iso1-1,2C			0.951614						1.315						292-iso1-1C 4mer	1536165	2873766	0.5345			No site	3761315	9647657	0.3899
0.59005	292-iso1-1,2C			1.06211						1.36307						292-iso1-1C 4mer	1776307	3565376	0.4982			No site	4395357	10251507	0.4288
From SWJ 55	No site			1.35852	1.44138	0.106972	1.02458	0.0760397		1.2678						292-iso1-1,2C 4mer	2231982	3484430	0.6406
0.307541	No site			1.34063						1.39428						292-iso1-1,2C 4mer	2378305	3374552	0.7048
	No site									1.2038						292-iso1-1,2C 4mer	2726157	3704664	0.7359
				1.43106						1.32243						No site	2846302	3493725	0.8147
	From SWJ 57		0.59005	1.60851						1.09295769275356						No site	2331512	2363960	0.9863
				1.46818						1.38878						No site	2201739	2604048	0.8455
+miR-290-295, 1:100	292-iso1-1C 4mer	1056227	1510715	0.6992	0.739456	0.0596752	0.525632	0.0424193		1.33412																2.07064
	292-iso1-1C 4mer	1959910	2793469	0.7016						1.35337
	292-iso1-1C 4mer	1249143	1720287	0.7261						1.33867					SWJ 57		FF	RL	FF/RL
				0.859536						1.48693					+Δ293	292-iso1-1C	851122	2420211	0.3517
	From SWJ 52		0.344023	0.742102						1.22064						292-iso1-1C	932573	2709962	0.3441
				0.749078						1.42005						292-iso1-1C	1176496	3637577	0.3234
	From SWK 46			0.803824						1.57617						292-iso1-1,2C	2056485	3678285	0.5591
				0.663848						1.54242						292-iso1-1,2C	2534020	4513130	0.5615
	SWK 46 * 2.07064373064226			0.709817												292-iso1-1,2C	2252941	3595029	0.6267
	292-iso1-1,2C 4mer	2357330	2155636	1.0936	1.13352	0.176979	0.805746	0.125803								No site	3631770	4300793	0.8444
	292-iso1-1,2C 4mer	2006392	1889789	1.0617												No site	5341652	5628254	0.9491
	292-iso1-1,2C 4mer	1679727	1581112	1.0624												No site	3941024	4549103	0.8663
				1.5156											+Δ292	292-iso2-1C bulge	2482084	4271096	0.5811
	From SWJ 52		0.344023	1.24934												292-iso2-1C bulge	2629630	3555611	0.7396
				1.16795												292-iso2-1C bulge	2767401	3814267	0.7255
	From SWK 46			1.17447												292-iso2-1,2C bulge	2489178	3712481	0.6705
				0.950425												292-iso2-1,2C bulge	3708662	5045741	0.735
	SWK 46 * 2.07064373064226			0.926199												292-iso2-1,2C bulge	3025257	4346133	0.6961
	No site	2579878	1588264	1.6243	1.38979	0.128589	0.987915	0.0914053								No site	3702274	4462633	0.8296
	No site	2761276	2007717	1.3753												No site	2195880	2714814	0.8089
	No site	3076793	2091595	1.471												No site	3973376	3549002	‘1.1196
				1.21852											+miR-292	293-1C bulge	2190418	3425917	0.6394
	From SWJ 52		0.344023	1.37113												293-1C bulge	2609843	3988616	0.6543
				1.40165												293-1C bulge	3230323	5293908	0.6102
	From SWK 46			1.33867												293-1,2C bulge	2641026	3727101	0.7086
				1.48693												293-1,2C bulge	903166	1019981	0.8855
	SWK 46 * 2.07064373064226			1.22064												293-1,2C bulge	3086052	3497851	0.8823
+Empty vector, 1:100	292-iso1-1C 4mer	1710422	1700136	1.0061	1.10998	0.0901697	0.789014	0.0640958								No site	3489472	4193395	0.8321
	292-iso1-1C 4mer	1600466	1508122	1.0612												No site	3901276	4422243	0.8822
	292-iso1-1C 4mer	2266778	1691106	’1.3404												No site	3071271	4081113	0.7526
				1.17301											+Empty vector	292-iso1-1C	2070056	3124411	0.6625
	From SWJ 19		0.565552	2.28555415904945												292-iso1-1C	1633989	2458787	0.6646
				1.22305												292-iso1-1C	1503929	2519838	0.5968
				0.976389												292-iso1-1,2C	1929041	3359729	0.5742
	From SWJ 52		0.344023	1.08394												292-iso1-1,2C	1625064	2827343	0.5748
				1.03801												292-iso1-1,2C	1654568	2955704	0.5598
				1.01482												292-iso2-1C bulge	1213160	1786495	0.6791
	From SWJ 55		0.307541	1.15757												292-iso2-1C bulge	1601412	1903247	0.8414
				1.1205												292-iso2-1C bulge	1571190	1704350	0.9219
				1.12279												292-iso2-1,2C bulge	760704	921658	0.8254
	From SWJ 57		0.59005	1.12634												292-iso2-1,2C bulge	1325330	1743960	0.76
				1.01144												292-iso2-1,2C bulge	1534014	2284285	0.6716
	From SWK 46			1.1401												293-1C bulge	923138	1596249	0.5783
				1.20035												293-1C bulge	1195014	2168962	0.551
	SWK 46 * 2.07064373064226			1.30409												293-1C bulge	1130516	2361248	’0.4788
	292-iso1-1,2C 4mer	1625994	1780919	0.913	1.06813	0.0884258	0.759266	0.0628562								293-1,2C bulge	1085674	1609687	0.6745
	292-iso1-1,2C 4mer	1476311	1618860	0.9119												293-1,2C bulge	691790	1039658	0.6654
	292-iso1-1,2C 4mer	1666472	1807988	0.9217												293-1,2C bulge	2141968	2540365	0.8432
				1.20272												No site	1249155	1758749	0.7103
	From SWJ 19		0.565552	1.56024523436889												No site	1111005	1423892	0.7803
				1.22924												No site	2206878	3422002	‘0.6449
				1.02987
	From SWJ 52		0.344023	1.08278
				0.997899											From SWK 46		FF	RL	FF/RL
				0.986534											+miR-294	292-iso1-1C 4mer	822960	2892757	0.2845
	From SWJ 55		0.307541	1.14879												292-iso1-1C 4mer	913123	3375913	0.2705
				1.1179												292-iso1-1C 4mer	668185	3745648	0.1784
				0.973137												292-iso1-1,2C 4mer	1944905	4146805	0.469
	From SWJ 57		0.59005	0.974154												292-iso1-1,2C 4mer	118026	225348	0.5238
				0.948733												292-iso1-1,2C 4mer	1307138	2669915	0.4896
	From SWK 46			1.05147												No site	1716164	2558727	0.6707
				1.11463												No site	2245741	3485479	0.6443
	SWK 46 * 2.07064373064226			1.09599												No site	1798720	2751964	0.6536
	No site	2158671	1763771	1.2239	1.39211	0.118417	0.989562	0.0841752							+miR-290-295	292-iso1-1C 4mer	1111372	2862521	0.3882
	No site	2596184	1941310	1.3373												292-iso1-1C 4mer	871831	2719740	0.3206
	No site	3233861	2343891	1.3797												292-iso1-1C 4mer	1044020	3045171	0.3428
				1.44675												292-iso1-1,2C 4mer	1084366	1911781	0.5672
	From SWJ 19		0.565552	1.53958												292-iso1-1,2C 4mer	1279967	2788805	0.459
				1.29042												292-iso1-1,2C 4mer	1342673	3002028	0.4473
				1.47431												No site	1596073	2468964	0.6465
	From SWJ 52		0.344023	1.56891												No site	256095	356605	0.7181
				1.315												No site	1635920	2774924	0.5895
				1.36307											+Empty vector	292-iso1-1C 4mer	1387391	2519993	0.5506
	From SWJ 55		0.307541	1.2678												292-iso1-1C 4mer	1228437	2119031	0.5797
				1.39428												292-iso1-1C 4mer	1852868	2942174	0.6298
				1.2038												292-iso1-1,2C 4mer	1286581	2533414	0.5078
	From SWJ 57		0.59005	1.32243												292-iso1-1,2C 4mer	713371	1325262	0.5383
				1.09295769275356												292-iso1-1,2C 4mer	1101080	2080383	0.5293
	From SWK 46			1.42005												No site	1388826	2025109	0.6858
				1.57617												No site	1459430	1917226	0.7612
	SWK 46 * 2.07064373064226			1.54242												No site	1735189	2329324	0.7449
					1.4068	0.122117	1	0.0868048
+miR-292	N Average	N STD		+miR-293	N Average	N STD		+miR-294	N Average	N STD		+Δ292	N Average	N STD
2-8C-S (292-iso1 WT)	0.462877	0.0508018		2-8C-S (292-iso1 WT)	0.803425	0.070506		2-8C-S (292-iso1 WT)	0.359827	0.0848425		2-8C-S (292-iso1 WT)	0.528372	0.0741931
3-8C-S (292-iso1 MUT)	0.827235	0.0945619		3-8C-S (292-iso1 MUT)	0.933631	0.0537727		3-8C-S (292-iso1 MUT)	0.727308	0.0407416		3-8C-S (292-iso1 MUT)	0.781106	0.0582894
No site	1.09824	0.0622025		No site	1.13799	0.0939763		No site	0.965852	0.0197096		No site	0.955199	0.0639271
+Δ293	N Average	N STD		+miR-290-295	N Average	N STD		+Empty vector	N Average	N STD
2-8C-S (292-iso1 WT)	0.422137	0.0733113		2-8C-S (292-iso1 WT)	0.525632	0.0424193		2-8C-S (292-iso1 WT)	0.789014	0.0640958
3-8C-S (292-iso1 MUT)	0.701659	0.0462062		3-8C-S (292-iso1 MUT)	0.805746	0.125803		3-8C-S (292-iso1 MUT)	0.759266	0.0628562
No site	1.02458	0.0760397		No site	0.987915	0.0914053		No site	0.989562	0.0841752
		+miR-292	+miR-293	+miR-294	+Δ292	+Δ293	+miR-290-295	+Empty vector	No site average
	2-7C-S	0.462877	0.803425	0.359827	0.528372	0.422137	0.530475	0.771812
	3-7C-S	0.827235	0.933631	0.727308	0.781106	0.701659	0.847148	0.755538
	No site	1.09824	1.13799	0.965852	0.955199	1.02458	1.0025	0.971166	1

## Sheet: 5D
Original: SWJ 27																		SWJ 13		FF	RL	FF/RL
Rescues	Targets	FF	RL	FF/RL	Average	STD	N Average	N STD										+miR-371, 1:100	292-iso1-1C 4mer	1406022	1677541	0.8381
+miR-371, 1:100	292-iso1-1C 4mer	1568708	1460692	1.0739	1.06199	0.0929754	0.785572	0.0687751											292-iso1-1C 4mer	1435395	1617614	0.8874
	292-iso1-1C 4mer	1449930	1269817	1.1418															292-iso1-1C 4mer	1170903	1183018	0.9898
	292-iso1-1C 4mer	1367496	1325049	1.032															292-iso1-1,2C 4mer	1635197	1668171	0.9802
				0.898855															292-iso1-1,2C 4mer	3091388	2777418	1.113
	From SWJ 13		0.932409	0.951729															292-iso1-1,2C 4mer	2246690	2399859	0.9362
				1.06155															292-iso2-1C-bulg 5:3	2917823	2352570	1.2403
				0.998802															292-iso2-1C-bulg 5:3	1432752	1719359	0.8333
	From SWJ 19		0.597115	1.97968526433151															292-iso2-1C-bulg 5:3	1535774	1657737	0.9264
				1.20982															292-iso2-1,2C-bulg 5:3	1770875	1365987	1.2964
				1.03812															292-iso2-1,2C-bulg 5:3	2484993	1743588	1.4252
	From SWJ 48		0.367588	1.17224															292-iso2-1,2C-bulg 5:3	2053859	1664373	1.234
				1.10314															No site	1931191	1453242	1.3289
	292-iso1-1,2C 4mer	1553776	1256988	1.2361	1.16834	0.143988	0.864234	0.10651											No site	2241665	1632579	1.3731
	292-iso1-1,2C 4mer	2313211	2512346	0.9207															No site	3196954	2571320	1.2433
	292-iso1-1,2C 4mer	1814767	1489646	1.2183														+miR-372-373, 1:100	292-iso1-1C 4mer	1145345	2278976	0.5026
				1.05126															292-iso1-1C 4mer	1406421	2546532	0.5523
	From SWJ 13		0.932409	1.19368															292-iso1-1C 4mer	1179807	1950352	0.6049
				1.00407															292-iso1-1,2C 4mer	1823733	2184807	0.8347
				1.04955															292-iso1-1,2C 4mer	1975849	2397140	0.8243
	From SWJ 19		0.597115	1.44361															292-iso1-1,2C 4mer	1818453	1809109	1.0052
				1.12273															292-iso2-1C-bulg 5:3	1748262	1989294	0.8788
				1.24133															292-iso2-1C-bulg 5:3	3061430	2518350	1.2156
	From SWJ 48		0.367588	1.28677															292-iso2-1C-bulg 5:3	2508057	2144831	1.1693
				1.25194															292-iso2-1,2C-bulg 5:3	3129276	2784874	1.1237
	No site	2096721	1371390	1.5289	1.42078	0.138612	1.05097	0.102533											292-iso2-1,2C-bulg 5:3	3134025	2462862	1.2725
	No site	2245755	1450797	1.5479															292-iso2-1,2C-bulg 5:3	3745571	3149378	1.1893
	No site	1868563	1352602	1.3815									1.5289	1.35187	0.154492				No site	3212104	2579305	1.2453
				1.42523									1.5479						No site	4605711	3436606	1.3402
	From SWJ 13		0.932409	1.47264									1.3815						No site	2610622	2029319	1.2865
				1.33343									1.42523					+miR-371-373, 1:100	292-iso1-1C 4mer	1540616	2448449	0.6292
				1.23276									1.47264						292-iso1-1C 4mer	1667941	2539062	0.6569
	From SWJ 19		0.597115	1.16092									1.33343						292-iso1-1C 4mer	1300340	2459076	0.5288
				1.61091									1.23276						292-iso1-1,2C 4mer	2292616	2709420	0.8462
				1.3545									1.16092						292-iso1-1,2C 4mer	2201768	2493911	0.8829
	From SWJ 48		0.367588	1.58846									1.61091						292-iso1-1,2C 4mer	2609481	2878968	0.9064
				1.41218									1.3545						292-iso2-1C-bulg 5:3	1843848	2652050	0.6953
+Δ371, 1:100	292-iso1-1C 4mer	1726761	3442640	0.5016	0.625468	0.06641	0.462667	0.0491244					1.58846						292-iso2-1C-bulg 5:3	1980284	2373486	0.8343
	292-iso1-1C 4mer	1748425	2761884	0.6331									1.41218						292-iso2-1C-bulg 5:3	2381346	3109089	0.7659
	292-iso1-1C 4mer	2256502	3728900	0.6051									0.9749						292-iso2-1,2C-bulg 5:3	2875805	2558679	1.1239
				0.539034									1.1856						292-iso2-1,2C-bulg 5:3	3879334	3200406	1.2121
	From SWJ 13		0.932409	0.592337									1.3101						292-iso2-1,2C-bulg 5:3	2761550	2524046	1.0941
				0.64875									1.33557						No site	3436740	3025495	1.1359
				0.670725									1.43735						No site	4619311	3288596	1.4046
	From SWJ 19		0.597115	1.46387182941559									1.37976						No site	4247956	3631920	1.1696
				0.627685									1.0879					+Empty vector, 1:100	292-iso1-1C 4mer	1635718	1812956	0.9022
				0.727988									1.24013						292-iso1-1C 4mer	1817900	2150648	0.8453
	From SWJ 48		0.367588	0.62706									1.32989						292-iso1-1C 4mer	1734917	2130563	0.8143
				0.706769									1.17632						292-iso1-1,2C 4mer	1485903	1742020	0.853
	292-iso1-1,2C 4mer	2764931	3087495	0.8955	0.897041	0.0940078	0.663553	0.0695388					1.4032						292-iso1-1,2C 4mer	1663301	2009635	0.8277
	292-iso1-1,2C 4mer	2907029	3969523	0.7323									1.0762						292-iso1-1,2C 4mer	1773244	2181218	0.813
	292-iso1-1,2C 4mer	2800353	3633621	0.7707									1.4076						292-iso2-1C-bulg 5:3	3239902	2556458	1.2673
				0.895208									1.3923						292-iso2-1C-bulg 5:3	2387007	2045868	1.1667
	From SWJ 13		0.932409	0.884054									1.5528						292-iso2-1C-bulg 5:3	2904920	2247834	1.2923
				1.07807									1.21824						292-iso2-1,2C-bulg 5:3	2257208	1806833	1.2493
				0.886596									1.50642						292-iso2-1,2C-bulg 5:3	3443780	2394222	1.4384
	From SWJ 19		0.597115	0.907698									1.25439						292-iso2-1,2C-bulg 5:3	2995392	2358767	1.2699
				0.888103									1.36439						No site	2248860	2000094	1.1244
				0.958681									1.65178						No site	2273927	2026181	1.1223
	From SWJ 48		0.367588	1.01853									1.41597						No site	2001250	1480330	1.3519
				0.849048									1.40456
	No site	2473448	2537104	0.9749	1.24474	0.145924	0.920754	0.107942					1.70109
	No site	2224980	1876708	1.1856									1.44646					SWJ 19		FF	RL	FF/RL
	No site	3618590	2762065	1.3101									1.2239					+Δ292, 1:100	292-iso1-1C 4mer	963151	2383957	0.404
				1.33557									1.3373						292-iso1-1C 4mer	1243110	1563959	0.7948
	From SWJ 13		0.932409	1.43735									1.3797						292-iso1-1C 4mer	1506931	3588243	0.42
				1.37976									1.20591						292-iso1-1,2C 4mer	2142871	3197050	0.6703
				1.0879									1.20366						292-iso1-1,2C 4mer	1964024	3227743	0.6085
	From SWJ 19		0.597115	1.24013									1.4499						292-iso1-1,2C 4mer	2267899	3493122	0.6492
				1.32989									1.39638						294-3p perfect	310962	2187928	0.1421
				1.17632									1.48598						294-3p perfect	345184	3796023	0.0909
	From SWJ 48		0.367588	1.4032									1.24549						294-3p perfect	348805	3387569	0.103
				1.0762									1.26663						No site	2518802	3224623	0.7811
+miR-371-373, 1:100	292-iso1-1C 4mer	1781561	2735072	0.6514	0.714064	0.0956825	0.528203	0.0707776					1.18747						No site	2383346	2982698	0.7991
	292-iso1-1C 4mer	1708163	2584893	0.6608									1.20542						No site	2776139	3834823	0.7239
	292-iso1-1C 4mer	1498104	2156675	0.6946														+Empty vector, 1:100	292-iso1-1C 4mer	1596451	2406393	0.6634
				0.674811															292-iso1-1C 4mer	2331665	1803916	1.2926
	From SWJ 13		0.932409	0.704519															292-iso1-1C 4mer	1865322	2696905	0.6917
				0.567133															292-iso1-1,2C 4mer	1824306	2681831	0.6802
				0.801353															292-iso1-1,2C 4mer	1710799	1938840	0.8824
	From SWJ 19		0.597115	0.895137															292-iso1-1,2C 4mer	1776169	2554850	0.6952
				0.834345															294-3p perfect	2041969	2925268	0.698
				0.716291															294-3p perfect	1996861	3120773	0.6399
	From SWJ 48		0.367588	0.601488															294-3p perfect	1808194	2805143	0.6446
				0.766891															No site	2544637	3051818	0.8338
	292-iso1-1,2C 4mer	1915548	2136449	0.8966	1.02279	0.105356	0.756568	0.0779335											No site	2368768	2669571	0.8873
	292-iso1-1,2C 4mer	2472302	2459594	1.0052															No site	2373994	3191952	0.7437
	292-iso1-1,2C 4mer	2629818	2392680	1.0991														+miR-371, 1:100	292-iso1-1C 4mer	1933756	3242193	0.5964
				0.907542															292-iso1-1C 4mer	1939492	1640704	1.1821
	From SWJ 13		0.932409	0.946902															292-iso1-1C 4mer	2099669	2906681	0.7224
				0.972106															292-iso1-1,2C 4mer	3095036	4938785	0.6267
				1.07282															292-iso1-1,2C 4mer	2530119	2935305	0.862
	From SWJ 19		0.597115	1.18034															292-iso1-1,2C 4mer	2911195	4342401	0.6704
				1.23243															No site	2642475	3589825	0.7361
				0.964122															No site	2959769	4269972	0.6932
	From SWJ 48		0.367588	1.03349															No site	2328222	2420565	0.9619
				0.962762														+miR-372-373, 1:100	292-iso1-1C 4mer	1139958	2846426	0.4005
	No site	2485338	1765610	1.4076	1.443	0.142889	1.06741	0.105697											292-iso1-1C 4mer	1318036	1507855	0.8741
	No site	3219447	2312311	1.3923															292-iso1-1C 4mer	1689410	4507390	0.3748
	No site	3592538	2313614	1.5528															292-iso1-1,2C 4mer	2280770	4308330	0.5294
				1.21824															292-iso1-1,2C 4mer	2842836	5244708	0.542
	From SWJ 13		0.932409	1.50642															292-iso1-1,2C 4mer	2288034	4314791	0.5303
				1.25439															No site	3489497	5371608	0.6496
				1.36439															No site	3651335	4931118	0.7405
	From SWJ 19		0.597115	1.65178															No site	2962319	3730464	0.7941
				1.41597														+miR-371-373, 1:100	292-iso1-1C 4mer	1727467	3610154	0.4785
				1.40456															292-iso1-1C 4mer	1536165	2873766	0.5345
	From SWJ 48		0.367588	1.70109															292-iso1-1C 4mer	1776307	3565376	0.4982
				1.44646															292-iso1-1,2C 4mer	2231982	3484430	0.6406
+Empty vector, 1:100	292-iso1-1C 4mer	1710422	1700136	1.0061	0.998393	0.0915597	0.738525	0.0677279											292-iso1-1,2C 4mer	2378305	3374552	0.7048
	292-iso1-1C 4mer	1600466	1508122	1.0612															292-iso1-1,2C 4mer	2726157	3704664	0.7359
	292-iso1-1C 4mer	2266778	1691106	’1.3404															No site	2846302	3493725	0.8147
				0.967601															No site	2331512	2363960	0.9863
	From SWJ 13		0.932409	0.906577															No site	2201739	2604048	0.8455
				0.873329
				1.11101
	From SWJ 19		0.597115	2.16474170770231														SWJ 48		FF	RL	FF/RL
				1.1584														+miR-292, 1:100	292-iso1-1C 4mer	391320	1766343	0.2215
				0.913794															292-iso1-1C 4mer	758955	3147093	0.2412
	From SWJ 48		0.367588	1.01445															292-iso1-1C 4mer	593118	2400562	0.2471
				0.971467															292-iso1-1,2C 4mer	1130689	3329008	0.3396
	292-iso1-1,2C 4mer	1625994	1780919	0.913	0.966874	0.0989196	0.71521	0.0731722											292-iso1-1,2C 4mer	1805866	3997108	0.4518
	292-iso1-1,2C 4mer	1476311	1618860	0.9119															292-iso1-1,2C 4mer	2524407	5749022	0.4391
	292-iso1-1,2C 4mer	1666472	1807988	0.9217															No site	1143731	2016135	0.5673
				0.914835															No site	1711490	2746992	0.623
	From SWJ 13		0.932409	0.887701															No site	1723379	3263365	0.5281
				0.871935														+Δ292, 1:100	292-iso1-1C 4mer	1297391	4258830	0.3046
				1.13914															292-iso1-1C 4mer	1137273	4831307	0.2354
	From SWJ 19		0.597115	1.47777199665521															292-iso1-1C 4mer	1172345	3697568	0.3171
				1.16426															292-iso1-1,2C 4mer	1802693	4848113	0.3718
				0.96385															292-iso1-1,2C 4mer	2040431	5787459	0.3526
	From SWJ 48		0.367588	1.01336															292-iso1-1,2C 4mer	2442015	5657459	0.4316
				0.933925															No site	2428441	5579802	0.4352
	No site	2158671	1763771	1.2239	1.29898	0.106043	0.960872	0.0784416											No site	2481522	5545569	0.4475
	No site	2596184	1941310	1.3373															No site	2624068	5439323	0.4824
	No site	3233861	2343891	1.3797														+miR-290-295, 1:100	292-iso1-1C 4mer	1034435	3498328	0.2957
				1.20591															292-iso1-1C 4mer	1089809	4268854	0.2553
	From SWJ 13		0.932409	1.20366															292-iso1-1C 4mer	900965	3496729	0.2577
				1.4499															292-iso1-1,2C 4mer	1922676	3687751	0.5214
				1.39638															292-iso1-1,2C 4mer	1699222	3953952	0.4298
	From SWJ 19		0.597115	1.48598															292-iso1-1,2C 4mer	1988386	4948085	0.4018
				1.24549															No site	1491745	3558223	0.4192
				1.26663															No site	2341052	4963063	0.4717
	From SWJ 48		0.367588	1.18747															No site	2353614	4880535	0.4822
				1.20542														+miR-371, 1:100	292-iso1-1C 4mer	1379380	3614853	0.3816
					1.35187	0.154492	1	0.11428											292-iso1-1C 4mer	1504185	3490848	0.4309
																			292-iso1-1C 4mer	1271260	3134753	0.4055
																			292-iso1-1,2C 4mer	1572888	3447005	0.4563
+miR-371	N Average	N STD		+Δ371	N Average	N STD		+miR-371-373	N Average	N STD		+Empty vector	N Average	N STD					292-iso1-1,2C 4mer	1229296	2598890	0.473
2-8C-S (292-iso1 WT)	0.785572	0.0687751		2-8C-S (292-iso1 WT)	0.462667	0.0491244		2-8C-S (292-iso1 WT)	0.528203	0.0707776		2-8C-S (292-iso1 WT)	0.738525	0.0677279					292-iso1-1,2C 4mer	1432105	3112212	0.4602
3-8C-S (292-iso1 MUT)	0.864234	0.10651		3-8C-S (292-iso1 MUT)	0.663553	0.0695388		3-8C-S (292-iso1 MUT)	0.756568	0.0779335		3-8C-S (292-iso1 MUT)	0.71521	0.0731722					No site	1725632	3465751	0.4979
No site	1.05097	0.102533		No site	0.920754	0.107942		No site	1.06741	0.105697		No site	0.960872	0.0784416					No site	2206619	3779036	0.5839
																			No site	1397230	2691898	0.5191
																		+Δ371, 1:100	292-iso1-1C 4mer	798828	2984927	0.2676
	+miR-371	+Δ371	+miR-371-373	+Empty vector	No site average														292-iso1-1C 4mer	841231	3649066	0.2305
2-7C-S	0.785572	0.462667	0.528203	0.738525															292-iso1-1C 4mer	763401	2938765	0.2598
3-7C-S	0.864234	0.663553	0.756568	0.71521															292-iso1-1,2C 4mer	1824778	5178180	0.3524
No site	1.05097	0.920754	1.06741	0.960872	1														292-iso1-1,2C 4mer	1525713	4074578	0.3744
																			292-iso1-1,2C 4mer	990427	3173646	0.3121
																			No site	1776739	4108884	0.4324
																			No site	2439413	4729067	0.5158
																			No site	3211014	8117201	0.3956
																		+miR-371-373, 1:100	292-iso1-1C 4mer	881820	3349516	0.2633
																			292-iso1-1C 4mer	788849	3568320	0.2211
																			292-iso1-1C 4mer	1122597	3981612	0.2819
																			292-iso1-1,2C 4mer	1034605	2919500	0.3544
																			292-iso1-1,2C 4mer	1123928	2958810	0.3799
																			292-iso1-1,2C 4mer	1240535	3505192	0.3539
																			No site	2996059	5802484	0.5163
																			No site	1993185	3187804	0.6253
																			No site	2235635	4204436	0.5317
																		+Empty vector, 1:100	292-iso1-1C 4mer	1146042	3412356	0.3359
																			292-iso1-1C 4mer	797459	2138629	0.3729
																			292-iso1-1C 4mer	747686	2093759	0.3571
																			292-iso1-1,2C 4mer	1029850	2906865	0.3543
																			292-iso1-1,2C 4mer	698004	1873839	0.3725
																			292-iso1-1,2C 4mer	750688	2186395	0.3433
																			No site	1633821	3508860	0.4656
																			No site	1242617	2846564	0.4365
																			No site	1131497	2553788	0.4431
													1	0.11428

## Sheet: 5E
Original: SWF 95												From SWJ 34		FF	RL	FF/RL			From SWG 54		FF	RL	FF/RL			From SWG 83		FF	RL			From SWG 68		FF	RL	FF/RL			SWG 94		FF	RL	FF/RL
WT ESCs		FF	RL	FF/RL	Average	STD	N Average	N STD				WT ESCs	1C9T	1545566	5705430	0.2709			J1	292-iso1-1C (1C8C) 4mer	82363312	254480672	0.3237			J1 1:100	292-iso1-1C 4mer	823653	1580909			WT	293 1C 4mer (Remake) ND	95916296	319431040	0.3003			J1 1:100	293 1C 7mer	940189	1837603	0.5116
	3-7UA-S			0.583416	0.533153	0.0655227	0.933268	0.114696					1C9T	2037273	9806433	0.2077				292-iso1-1C (1C8C) 4mer	104274128	285826976	0.3648				292-iso1-1C 4mer	1623934	2633012				293 1C 4mer (Remake) ND	155276176	560311616	0.2771				293 1C 7mer	816302	2445381	0.3338
From SWJ 34	3-7UA-S			0.459048									1C9T	2551783	10234320	0.2493				292-iso1-1C (1C8C) 4mer	67588288	193898080	0.3486				292-iso1-1C 4mer	1554993	2751876				293 1C 4mer (Remake) ND	225045520	729161600	0.3086				293 1C 7mer	925490	2855461	0.3241
	3-7UA-S			0.556996									1C2C9T	2119734	11002248	0.1927				292-iso1-1,2C 4mer	179109760	287982624	0.6219				292-iso2-1C 4mer	2721550	2541179				293 1C 4mer (Remake) 1:10	19997094	63969484	0.3126				293 1,2C 7mer	800568	3082428	0.2597
	292-iso2-1C 4mer	338662784	765357888	0.4425	0.437983	0.0241996	0.766676	0.0423607					1C2C9T	2570715	12144371	0.2117				292-iso1-1,2C 4mer	203426368	340970656	0.5966				292-iso2-1C 4mer	3089808	3118992				293 1C 4mer (Remake) 1:10	32756348	124773400	0.2625				293 1,2C 7mer	1152999	4214041	0.2736
	292-iso2-1C 4mer	311111040	690508800	0.4506									1C2C9T	2420451	10000462	0.242				292-iso1-1,2C 4mer	196234608	345470304	0.568				292-iso2-1C 4mer	2675621	2452551				293 1C 4mer (Remake) 1:10	27970466	121110576	0.2309				293 1,2C 7mer	870764	3311796	0.2629
	292-iso2-1C 4mer	533131552	1231849088	0.4328									1C9A	2463064	10958924	0.2248				292-iso2-1C 4mer	266413968	421827488	0.6316				292-iso2-1C 8mer	2792351	3517292				293 1C 4mer (Remake) 1:100	1196157	4909970	0.2436				293 1C 4mer	3597638	4070072	0.8839
				0.405587									1C9A	2804557	13959679	0.2009				292-iso2-1C 4mer	223969888	330251424	0.6782				292-iso2-1C 8mer	2800658	3235949				293 1C 4mer (Remake) 1:100	1938963	8356969	0.232				293 1C 4mer	3721651	5131591	0.7252
	From SWG 54	WT	1.55725	0.435512									1C9A	2612011	11964998	0.2183				292-iso2-1C 4mer	278841376	444440224	0.6274				292-iso2-1C 8mer	3574874	3447606				293 1C 4mer (Remake) 1:100	2709697	13030993	0.2079				293 1C 4mer	4194554	5127883	0.818
				0.40289									1C2C9A	20349802	14745347	1.3801				292-iso2-1,2C 4mer	283904352	367747168	0.772				293 1C 4mer (Remake)	2365452	3005332				293 1C 4mer (Remake) 1:1000	138032	558656	0.2471				293 1,2C 4mer	3741167	4772288	0.7839
				0.466081									1C2C9A	14665530	13505977	1.0859				292-iso2-1,2C 4mer	327540992	386608352	0.8472				293 1C 4mer (Remake)	2686993	3147704				293 1C 4mer (Remake) 1:1000	314316	1117387	0.2813				293 1,2C 4mer	3912808	5678959	0.689
	From SWG 83	WT	2.29788	0.431093									1C2C9A	18596092	14113101	1.3176				292-iso2-1,2C 4mer	288197088	324007872	0.8895				293 1C 4mer (Remake)	2025405	2202459				293 1C 4mer (Remake) 1:1000	336041	1361476	0.2468				293 1,2C 4mer	3328423	4447324	0.7484
				0.474785									1C9G	3071145	10404164	0.2952				292-iso2-1C 8mer	192468528	395524864	0.4866				Luciferase	3063777	2415524				Luciferase ND	170204528	346918752	0.4906				294 1C 8mer	354745	5863315	0.0605
	292-iso2-1,2C 4mer	419193664	881104192	0.4758	0.51703	0.0472271	0.905046	0.0826695					1C9G	4631409	12874323	0.3597				292-iso2-1C 8mer	217813728	407301280	0.5348				Luciferase	3907086	3202265				Luciferase ND	237434560	694381056	0.3419				294 1C 8mer	389940	4556437	0.0856
	292-iso2-1,2C 4mer	458917792	821761088	0.5585									1C9G	4373219	13476360	0.3245				292-iso2-1C 8mer	200233152	396961984	0.5044				Luciferase	5369167	3674656				Luciferase ND	214333008	554992512	0.3862				294 1C 8mer	445966	4362800	0.1022
	292-iso2-1,2C 4mer	556366784	1217636864	0.4569									1C2C9G	16177761	9846134	1.6431				292-iso2-1,2C 8mer	164601648	300530688	0.5477			290-295-/- 1:100	292-iso1-1C 4mer	775463	1342788			KO	293 1C 4mer (Remake) ND	51054676	149212784	0.3422				294 1,2C 8mer	1682706	5978983	0.2814
				0.495746									1C2C9G	12269061	13575669	0.9038				292-iso2-1,2C 8mer	207404496	413048416	0.5021				292-iso1-1C 4mer	660989	1026168				293 1C 4mer (Remake) ND	53043448	116067000	0.457				294 1,2C 8mer	1546710	5116408	0.3023
	From SWG 54	WT	1.55725	0.544036									1C2C9G	10905500	9912752	1.1001				292-iso2-1,2C 8mer	176297872	327142496	0.5389				292-iso1-1C 4mer	836725	1410159				293 1C 4mer (Remake) ND	66215616	162796144	0.4067				294 1,2C 8mer	1714806	5500871	0.3117
				0.5712									1C9C	3633372	10607958	0.3425				293 1C 4mer (Remake)	255448784	507244704	0.5036				292-iso2-1C 4mer	1055221	1780198				293 1C 4mer (Remake) 1:10	9213803	28281092	0.3258				294 1C 4mer	1389907	4975936	0.2793
Ori: SWG 94	293 1C 4mer			0.514947	0.388019	0.0727081	0.679215	0.127273					1C9C	3594313	11331600	0.3172				293 1C 4mer (Remake)	231292192	416958912	0.5547				292-iso2-1C 4mer	931327	1353361				293 1C 4mer (Remake) 1:10	8391707	25486684	0.3293				294 1C 4mer	1607394	4934155	0.3258
	293 1C 4mer			0.422491									1C9C	3733009	11018697	0.3388				293 1C 4mer (Remake)	278789472	524117440	0.5319				292-iso2-1C 4mer	1060457	1576611				293 1C 4mer (Remake) 1:10	5470695	15305804	0.3574				294 1C 4mer	1210690	4121572	0.2937
1.71649	293 1C 4mer			0.476554									1C2C9C	11390378	11668009	0.9762				293 1,2C 4mer (Remake)	272551264	453171296	0.6014				292-iso2-1C 8mer	962211	1775300				293 1C 4mer (Remake) 1:100	716182	2189523	0.3271				294 1,2C 4mer	2955350	3993129	0.7401
				0.342533									1C2C9C	9655430	9298097	1.0384				293 1,2C 4mer (Remake)	285753440	409183328	0.6984				292-iso2-1C 8mer	935508	1732404				293 1C 4mer (Remake) 1:100	714514	2419109	0.2954				294 1,2C 4mer	4066742	4775973	0.8515
	From SWG 83	WT	1.33871	0.371472									1C2C9C	13162776	13945582	0.9439				293 1,2C 4mer (Remake)	245015952	346505504	0.7071				292-iso2-1C 8mer	998862	1687879				293 1C 4mer (Remake) 1:100	875196	2691188	0.3252				294 1,2C 4mer	5152691	5482645	0.9398
				0.400195									No site	18000300	13853965	1.2993				Luciferase	391693120	450607616	0.8693				293 1C 4mer (Remake)	1042113	1364298				293 1C 4mer (Remake) 1:1000	45826	103359	0.4434				Luciferase	3159288	3569644	0.885
				0.343563									No site	20267752	13042776	1.5539				Luciferase	353389984	408456096	0.8652				293 1C 4mer (Remake)	1216637	1791949				293 1C 4mer (Remake) 1:1000	84521	301355	0.2805				Luciferase	1699885	1407875	1.2074
	From SWG 68	WT	0.413077	0.327202									No site	17323136	15299958	1.1322				Luciferase	279621056	296807200	0.9421				293 1C 4mer (Remake)	976747	1638974				293 1C 4mer (Remake) 1:1000	50600	164889	0.3069				Luciferase	881793	1027814	0.8579
				0.293213								KO ESCs	1C9T	3171969	3003052	1.0562			290-295-/-	292-iso1-1C (1C8C) 4mer	132125888	235079888	0.562				Luciferase	1004509	1441042				Luciferase ND	77364168	210803264	0.367			290-295-/- 1:100	293 1C 7mer	516781	1408793	0.3668
Ori: SWG 94	293 1,2C 4mer			0.456688	0.431365	0.0279343	0.755092	0.0488982					1C9T	3379022	3100238	1.0899				292-iso1-1C (1C8C) 4mer	85194488	146455344	0.5817				Luciferase	1374717	1582371				Luciferase ND	33516906	80980496	0.4139				293 1C 7mer	643316	2583067	0.2491
	293 1,2C 4mer			0.401401									1C9T	4324126	3817424	1.1327				292-iso1-1C (1C8C) 4mer	108652800	186256288	0.5834				Luciferase	1173740	1617643				Luciferase ND	64756936	118399040	0.5469				293 1C 7mer	491257	2396967	0.2049
1.71649	293 1,2C 4mer			0.436006									1C2C9T	3174487	2898113	1.0954				292-iso1-1,2C 4mer	70719152	159866416	0.4424																	293 1,2C 7mer	496651	2268455	0.2189
	No site	466959168	793212416	0.5887	0.571275	0.0671875	1	0.11761					1C2C9T	3397714	3069561	1.1069				292-iso1-1,2C 4mer	72272928	148882208	0.4854																	293 1,2C 7mer	433242	2129693	0.2034
	No site	745842368	1423477120	0.524									1C2C9T	3744556	3245788	1.1537				292-iso1-1,2C 4mer	88117920	151733536	0.5807																	293 1,2C 7mer	615724	3252726	0.1893
	No site	622046464	1026273792	0.6061									1C9A	2998362	2947074	1.0174				292-iso2-1C 4mer	107532120	207084016	0.5193																	293 1C 4mer	1657587	2893676	0.5728
				0.558228									1C9A	4378900	3805036	1.1508				292-iso2-1C 4mer	113519448	206155184	0.5507																	293 1C 4mer	1721376	2654019	0.6486
	From SWG 54	WT	1.55725	0.555595									1C9A	3865877	3576066	1.081				292-iso2-1C 4mer	85424112	145967664	0.5852																	293 1C 4mer	1562023	2758709	0.5662
				0.604977									1C2C9A	3606302	2802453	1.2868				292-iso2-1,2C 4mer	54091676	77163448	0.701																	293 1,2C 4mer	946766	1620006	0.5844
				0.551987									1C2C9A	4404224	3400730	1.2951				292-iso2-1,2C 4mer	85536200	138805008	0.6162																	293 1,2C 4mer	1260535	2330010	0.541
	From SWG 83	WT	2.29788	0.530967									1C2C9A	3908404	3046330	1.283				292-iso2-1,2C 4mer	82865776	116491608	0.7113																	293 1,2C 4mer	1221628	2886814	0.4232
				0.635846									1C9G	3187485	2646785	1.2043				292-iso2-1C 8mer	91817904	172316976	0.5328																	294 1C 8mer	712559	1815558	0.3925
				0.515588									1C9G	3761376	3025305	1.2433				292-iso2-1C 8mer	76535544	134902992	0.5673																	294 1C 8mer	1145499	2140093	0.5353
	SWG 94	WT	1.71649	0.703413									1C9G	3523506	2818636	1.2501				292-iso2-1C 8mer	64549420	152636176	0.4229																	294 1C 8mer	1152807	2946816	0.3912
				0.4998									1C2C9G	2238642	2785504	0.8037				292-iso2-1,2C 8mer	46488120	141187376	0.3293																	294 1,2C 8mer	276227	1707015	0.1618
				0.69192									1C2C9G	3217291	3497725	0.9198				292-iso2-1,2C 8mer	58699980	189557088	0.3097																	294 1,2C 8mer	396149	2139989	0.1851
	From SWG 68	WT	0.413077	0.4822									1C2C9G	2927453	3222705	0.9084				292-iso2-1,2C 8mer	60211796	201984800	0.2981																	294 1,2C 8mer	475545	2747272	0.1731
				0.544679									1C9C	2531798	2439045	1.038				293 1C 4mer (Remake)	105934816	209329424	0.5061																	294 1C 4mer	902880	1450656	0.6224
				0.550625									1C9C	3343288	2759944	1.2114				293 1C 4mer (Remake)	132387512	202826592	0.6527																	294 1C 4mer	893161	1671810	0.5342
	From SWJ 34	WT	2.35968	0.658521									1C9C	3877288	3030826	1.2793				293 1C 4mer (Remake)	116554888	198114304	0.5883																	294 1C 4mer	1009161	1803321	0.5596
				0.479811									1C2C9C	3441114	3284725	1.0476				293 1,2C 4mer (Remake)	48849988	125701960	0.3886																	294 1,2C 4mer	577666	1099365	0.5255
													1C2C9C	3325865	2740845	1.2134				293 1,2C 4mer (Remake)	82283408	195648656	0.4206																	294 1,2C 4mer	917791	1697698	0.5406
													1C2C9C	2709765	2520852	1.0749				293 1,2C 4mer (Remake)	46902624	103255936	0.4542																	294 1,2C 4mer	840712	1520885	0.5528
													No site	4291821	3236688	1.326				Luciferase	75199952	134298352	0.5599																	Luciferase	712082	972558	0.7322
KO ESCs	3-7UA-S			0.440335									No site	3631144	2359562	1.5389				Luciferase	94158384	141112768	0.6673																	Luciferase	645164	1055882	0.611
From SWJ 34	3-7UA-S			0.443175									No site	4398019	2999629	1.4662				Luciferase	90663064	146552592	0.6186																	Luciferase	436992	738227	0.5919
	3-7UA-S			0.439035
	292-iso2-1C 4mer	173991840	425665888	0.4088	0.460433	0.0370255	0.96889	0.0779127
	292-iso2-1C 4mer	221834432	445624416	0.4978
	292-iso2-1C 4mer	109782056	231275904	0.4747
				0.392134
	From SWG 54	KO	1.32429	0.415844
				0.441896
				0.387172
	From SWG 83	KO	1.5311	0.44948
				0.439291
	292-iso2-1,2C 4mer	142778320	358785664	0.3979	0.461727	0.0602303	0.971612	0.126743
	292-iso2-1,2C 4mer	130310800	320401024	0.4067
	292-iso2-1,2C 4mer	204572496	471411744	0.434
				0.529339
	From SWG 54	KO	1.32429	0.465305
				0.537117
Ori: SWG 94	293 1C 4mer			0.412572	0.401543	0.0624627	0.844968	0.13144
0.720273	293 1C 4mer			0.467169
	293 1C 4mer			0.407818
				0.498856
	From SWG 83	KO	1.33871	0.443406
				0.389262
				0.343359
	From SWG 68	KO	0.413077	0.310083
				0.341364								WT ES cells	KO ES cells
	293 1,2C 4mer			0.420927	0.371805	0.0600797	0.782389	0.126426			3-7UA-S	0.930568	0.926102
	293 1,2C 4mer			0.389668							3-7CG-S	0.764457	0.962047
	293 1,2C 4mer			0.304819							4-7CG-S	0.902427	0.96475
	Luciferase	181437488	391491520	0.4635	0.475217	0.0501164	1	0.10546			4-7CGC-S	0.677249	0.839
	Luciferase	160731328	351850272	0.4568							5-7CGC-S	0.752906	0.776864
	Luciferase	97959800	206896720	0.4735							No site	1	1
				0.422792
	From SWG 54	KO	1.32429	0.503891
				0.467117
				0.455293
	From SWG 83	KO	1.5311	0.567434
				0.473907
				0.527384
	SWG 94	KO	1.71649	0.440087
				0.42633
				0.385242
	From SWG 68	KO	0.413077	0.434473
				0.574084
				0.453749
	From SWJ 34	KO	2.35968	0.526602
				0.501725
	N Avg	N STD
3-7UA-S	0.930568	0.114364
3-7CG-S	0.764457	0.0422381
4-7CG-S	0.902427	0.0824303
4-7CGC-S	0.677249	0.126905
5-7CGC-S	0.752906	0.0487567
No site	1	0.0660167
	N Avg	N STD
3-7UA-S	0.926102	0.0044482
3-7CG-S	0.962047	0.0773624
4-7CG-S	0.96475	0.125847
4-7CGC-S	0.839	0.130512
5-7CGC-S	0.776864	0.125533
No site	1	0.105884
