# Supplementary material for: Evolution of the miR-290–295/miR-371–373 Cluster Family Seed Repertoire
Source: PLoS One. 2014 Sep 30;9(9):e108519. doi: 10.1371/journal.pone.0108519 (PMC4182485; doi:10.1371/journal.pone.0108519)
Supplement: Dataset S5 — Supplementary Luciferase Assays Raw Data. (XLSX) [file pone.0108519.s010.xlsx]

## Sheet: 7A
Ori: SWI 30 A																SWJ 55		FF	RL	FF/RL		SWI 73		FF	RL	FF/RL		SWJ 52		FF	RL	FF/RL		SWJ 57		FF	RL	FF/RL
Rescue	Target	FF	RL	FF/RL	Average	STD	N Average	N STD								+miR-292	292-iso2-1C bulge	447117	3758684	0.119		miR-293 rescue 1:100	292-iso2-1C-bulge 5:3 4mer	930842	1664122	0.5594		+Δ292, 1:100	292-iso2-1C bulge	2278008	3645732	0.6248		+Δ293	292-iso1-1C	851122	2420211	0.3517
+miR-292	292-iso2-1C bulge 5:3	494708	1834971	0.2696	0.235223	0.0491003	0.322022	0.0672188									292-iso2-1C bulge	881552	7313577	0.1205			292-iso2-1C-bulge 5:3 4mer	1859655	2502685	0.7431			292-iso2-1C bulge	2746286	4145550	0.6625			292-iso1-1C	932573	2709962	0.3441
	292-iso2-1C bulge 5:3	639478	2752419	0.2323													292-iso2-1C bulge	555266	4171338	0.1331			292-iso2-1C-bulge 5:3 4mer	3291169	4521459	0.7279			292-iso2-1C bulge	3423223	5308068	0.6449			292-iso1-1C	1176496	3637577	0.3234
	292-iso2-1C bulge 5:3	768357	2436650	0.3153													292-iso2-1,2C bulge	1674578	4831776	0.3466			292-iso2-1,2C-bulge 5:3 4mer	1553982	2458523	0.6321			No site	4092898	5487723	0.7458			292-iso1-1,2C	2056485	3678285	0.5591
				0.189753													292-iso2-1,2C bulge	1598801	5154529	0.3102			292-iso2-1,2C-bulge 5:3 4mer	2483208	3667339	0.6771			No site	4079325	5118763	0.7969			292-iso1-1,2C	2534020	4513130	0.5615
	From SWJ 55		0.610946	0.192145													292-iso2-1,2C bulge	1349384	3561214	0.3789			292-iso2-1,2C-bulge 5:3 4mer	2168430	3464379	0.6259			No site	3398690	5007043	0.6788			292-iso1-1,2C	2252941	3595029	0.6267
				0.212237													293-1C bulge	2503403	8853986	0.2827			No site	1652695	2518092	0.6563		+Δ293, 1:100	292-iso2-1C bulge	1512106	4793076	0.3155			No site	3631770	4300793	0.8444
	292-iso2-1,2C bulge 5:3	1596445	2910813	0.5485	0.549815	0.0348189	0.752703	0.0476674									293-1C bulge	2429703	7832531	0.3102			No site	1927243	2920311	0.6599			292-iso2-1C bulge	1855798	5780723	0.321			No site	5341652	5628254	0.9491
	292-iso2-1,2C bulge 5:3	1680944	3087765	0.5444													293-1C bulge	1903276	5560107	0.3423			No site	2836768	4144889	0.6844			292-iso2-1C bulge	1841450	5453501	0.3377			No site	3941024	4549103	0.8663
	292-iso2-1,2C bulge 5:3	1934736	3489228	0.5545													293-1,2C bulge	4145323	8821790	0.4699		Complete mouse rescue 1:100	292-iso2-1C-bulge 5:3 4mer	1235939	3366391	0.3671			No site	3367593	4278610	0.7871		+Δ292	292-iso2-1C bulge	2482084	4271096	0.5811
				0.552677													293-1,2C bulge	3259252	7672606	0.4248			292-iso2-1C-bulge 5:3 4mer	1401497	3607794	0.3885			No site	4288831	4264938	1.0056			292-iso2-1C bulge	2629630	3555611	0.7396
	From SWJ 55		0.610946	0.494635													293-1,2C bulge	2163736	5260647	0.4113			292-iso2-1C-bulge 5:3 4mer	1656379	4960070	0.3339			No site	3861831	4852403	0.7959			292-iso2-1C bulge	2767401	3814267	0.7255
				0.604181													292-3p perfect	1000422	8422409	0.1188			292-iso2-1,2C-bulge 5:3 4mer	2706711	3600775	0.7517		+miR-290-295, 1:100	292-iso2-1C bulge	1381347	3440637	0.4015			292-iso2-1,2C bulge	2489178	3712481	0.6705
	No site	1826803	2377300	0.7684	0.778109	0.0303338	1.06524	0.0415273									292-3p perfect	793616	5277560	0.1504			292-iso2-1,2C-bulge 5:3 4mer	3021721	3771101	0.8013			292-iso2-1C bulge	1309588	3750274	0.3492			292-iso2-1,2C bulge	3708662	5045741	0.735
	No site	2507415	2836357	’0.884													292-3p perfect	626834	4868542	0.1288			292-iso2-1,2C-bulge 5:3 4mer	2877328	3811888	0.7548			292-iso2-1C bulge	1217798	2769010	0.4398			292-iso2-1,2C bulge	3025257	4346133	0.6961
	No site	1880020	2538308	0.7407													293-3p perfect	3141498	8198058	0.3832			No site	2701999	4020548	0.672			No site	2374552	4165099	0.5701			No site	3702274	4462633	0.8296
				0.792818													293-3p perfect	3098278	7579454	0.4088			No site	2995698	4026358	0.744			No site	1614233	2486691	0.6491			No site	2195880	2714814	0.8089
	From SWJ 55		0.610946	0.810518													293-3p perfect	2378530	4983996	0.4772			No site	4462183	5393178	0.8274			No site	2394843	2876598	0.8325			No site	3973376	3549002	‘1.1196
				0.847033748780893													No site	4253573	8554693	0.4972		Mouse rescue Δ293 1:100	292-iso2-1C-bulge 5:3 4mer	1549738	5531656	0.2802		+Empty vector, 1:100	292-iso2-1C bulge	2883	3141	0.9178		+miR-292	293-1C bulge	2190418	3425917	0.6394
+miR-293	292-iso2-1C bulge 5:3			0.623027	0.753781	0.113552	1.03193	0.155453			No site	No site average	No site STD				No site	4289432	8438675	0.5083			292-iso2-1C-bulge 5:3 4mer	1355809	5340687	0.2539			292-iso2-1C bulge	2514	2639	0.9527			293-1C bulge	2609843	3988616	0.6543
From SWI 73	292-iso2-1C bulge 5:3			0.827622							0.7684	0.730454	0.0733768				No site	3971484	7476662	0.5312			292-iso2-1C-bulge 5:3 4mer	768906	3189984	0.241			292-iso2-1C bulge	2164	2275	0.9512			293-1C bulge	3230323	5293908	0.6102
0.897874	292-iso2-1C bulge 5:3			0.810693							’0.884					+miR-293	292-iso1-1C	2601603	7821471	0.3326			292-iso2-1,2C-bulge 5:3 4mer	1836397	2482654	0.7397			No site	1235048	1550894	0.7963			293-1,2C bulge	2641026	3727101	0.7086
	292-iso2-1,2C bulge 5:3			0.703996	0.718401	0.0311213	0.983498	0.0426054			0.7407						292-iso1-1C	3113912	8135903	0.3827			292-iso2-1,2C-bulge 5:3 4mer	1973015	3504933	0.5629			No site	1543059	2298680	0.6713			293-1,2C bulge	903166	1019981	0.8855
	292-iso2-1,2C bulge 5:3			0.754115							0.792818						292-iso1-1C	1857434	5671132	0.3275			292-iso2-1,2C-bulge 5:3 4mer	2476725	3884776	0.6375			No site	1526597	1788852	0.8534			293-1,2C bulge	3086052	3497851	0.8823
	292-iso2-1,2C bulge 5:3			0.697091							0.810518						292-iso1-1,2C	2368231	5741380	0.4125			No site	2153891	3382255	0.6368									No site	3489472	4193395	0.8321
	No site			0.730949	0.742717	0.0170298	1.01679	0.023314			0.847033748780893						292-iso1-1,2C	2202952	5834176	0.3776			No site	2899260	4721001	0.6141									No site	3901276	4422243	0.8822
	No site			0.734958							0.730949						292-iso1-1,2C	2361756	5600187	0.4217			No site	2672173	4889734	0.5465									No site	3071271	4081113	0.7526
	No site			0.762245							0.734958						No site	2926091	5615614	0.5211		Human rescue 1:100	292-iso2-1C-bulge 5:3 4mer	784240	1805856	0.4343								+Empty vector	292-iso1-1C	2070056	3124411	0.6625
+Δ292	292-iso2-1C bulge 5:3	1352017	2188647	0.6177	0.620642	0.0540279	0.849666	0.0739648			0.762245						No site	4261542	9192943	0.4636			292-iso2-1C-bulge 5:3 4mer	1293752	2765210	0.4679									292-iso1-1C	1633989	2458787	0.6646
	292-iso2-1C bulge 5:3	1593219	2907970	0.5479							0.7241						No site	3338370	5147906	0.6485			292-iso2-1C-bulge 5:3 4mer	1232125	2292813	0.5374									292-iso1-1C	1503929	2519838	0.5968
	292-iso2-1C bulge 5:3	1384472	2609121	0.5306							0.7551					+Δ293	292-iso1-1C	1810236	10982731	0.1648			292-iso2-1,2C-bulge 5:3 4mer	2175096	2893207	0.7518									292-iso1-1,2C	1929041	3359729	0.5742
				0.610793							0.7097						292-iso1-1C	1287841	5740647	0.2243			292-iso2-1,2C-bulge 5:3 4mer	1998736	2720889	0.7346									292-iso1-1,2C	1625064	2827343	0.5748
	From SWJ 52		1.02293	0.647648							0.729081						292-iso1-1C	1896800	10809901	0.1755			292-iso2-1,2C-bulge 5:3 4mer	1825079	2794623	0.6531									292-iso1-1,2C	1654568	2955704	0.5598
				0.630443							0.779035						292-iso1-1,2C	2015654	10456795	0.1928			No site	1148657	1632171	0.7038									292-iso2-1C bulge	1213160	1786495	0.6791
				0.542606							0.663583						292-iso1-1,2C	2250053	12979964	0.1733			No site	1726603	2417290	0.7143									292-iso2-1C bulge	1601412	1903247	0.8414
	From SWJ 57		1.07094	0.690606							0.709231						292-iso1-1,2C	1909121	13000364	0.1469			No site	2131338	3283511	0.6491									292-iso2-1C bulge	1571190	1704350	0.9219
				0.67744							0.683949						No site	5322695	12739181	0.4178		Empty vector rescue 1:100	292-iso2-1C-bulge 5:3 4mer	1727115	2143738	0.8057									292-iso2-1,2C bulge	760704	921658	0.8254
	292-iso2-1,2C bulge 5:3	1775364	2845890	0.6238	0.643817	0.0258755	0.881392	0.0354238			0.60866						No site	3724119	9033569	0.4123			292-iso2-1C-bulge 5:3 4mer	1426390	1949737	0.7316									292-iso2-1,2C bulge	1325330	1743960	0.76
	292-iso2-1,2C bulge 5:3	2555394	2977960	0.8581							0.769455						No site						292-iso2-1C-bulge 5:3 4mer	1135147	1405876	0.8074									292-iso2-1,2C bulge	1534014	2284285	0.6716
	292-iso2-1,2C bulge 5:3	3334271	5268067	0.6329							0.983056434965514					+Δ292	293-1C bulge	1217859	20981432	0.058			292-iso2-1,2C-bulge 5:3 4mer	1543728	2399366	0.6434									293-1C bulge	923138	1596249	0.5783
				0.626084							0.778057						293-1C bulge	599257	9448210	0.0634			292-iso2-1,2C-bulge 5:3 4mer	1240581	1663769	0.7456									293-1C bulge	1195014	2168962	0.551
	From SWJ 57		1.07094	0.686311							0.7206						293-1C bulge	940268	13113778	0.0717			292-iso2-1,2C-bulge 5:3 4mer	811461	1339900	0.6056									293-1C bulge	1130516	2361248	’0.4788
				0.649988							0.7625						No site	4752318	12140752	0.3914			No site	1154504	1810660	0.6376									293-1,2C bulge	1085674	1609687	0.6745
	No site	2294932	3169458	0.7241	0.73632	0.0381874	1.00803	0.052279			0.8793						No site	8136894	18987628	0.4285			No site	1164774	1947207	0.5982									293-1,2C bulge	691790	1039658	0.6654
	No site	2428496	3216336	0.7551							0.748435						No site	9127293	20408522	0.4472			No site	1286950	2328004	0.5528									293-1,2C bulge	2141968	2540365	0.8432
	No site	2398778	3380012	0.7097							0.828624					+Empty vector	292-iso2-1C bulge	4017986	9567895	0.4199															No site	1249155	1758749	0.7103
				0.729081							0.92151						292-iso2-1C bulge	4177069	10689169	0.3908															No site	1111005	1423892	0.7803
	From SWJ 52		1.02293	0.779035							0.557319484460859						292-iso2-1C bulge	4715617	12282413	0.3839															No site	2206878	3422002	‘0.6449
				0.663583							0.634548						292-iso2-1,2C bulge	3954902	9776124	0.4045
				0.774644							0.813837						292-iso2-1,2C bulge	4331025	11205708	0.3865
	From SWJ 57		1.07094	0.755316							‘0.5442						292-iso2-1,2C bulge	3186191	9151761	0.3482
				1.04543388929986							0.6134						293-1C bulge	3364878	12175887	0.2764
+Δ293	292-iso2-1C bulge 5:3			0.312071	0.302604	0.022666	0.414268	0.03103			0.6186						293-1C bulge	3707248	12548092	0.2954
From SWI 73	292-iso2-1C bulge 5:3			0.282779							0.710122						293-1C bulge	4179924	13511561	0.3094
0.897874	292-iso2-1C bulge 5:3			0.268412							0.66624						293-1,2C bulge	2693082	7550488	0.3567
				0.308427							0.615677						293-1,2C bulge	110016	432789	0.2542
	From SWJ 52		1.02293	0.313804							0.778449						293-1,2C bulge	4274875	14571197	0.2934
				0.330129							0.656251						292-iso1-1C	2724631	8731058	0.3121
	292-iso2-1,2C bulge 5:3			0.823835	0.720257	0.0988539	0.98604	0.135332			0.834268						292-iso1-1C	3368115	9461003	0.356
From SWI 73	292-iso2-1,2C bulge 5:3			0.626925							0.668442						292-iso1-1C	3044208	8833776	0.3446
0.897874	292-iso2-1,2C bulge 5:3			0.710011							0.621721						292-iso1-1,2C	2328427	7674948	0.3034
	No site			0.709231	0.70987	0.0691297	0.97182	0.0946393			0.68375						292-iso1-1,2C	3694462	10456935	0.3533
	No site			0.683949							0.774644						292-iso1-1,2C	2703383	7863844	0.3438
	No site			0.60866							0.755316						292-3p perfect	3020448	9767200	0.3092
				0.769455							1.04543388929986						292-3p perfect	2860600	9342485	0.3062
	From SWJ 52		1.02293	0.983056434965514							0.663247						292-3p perfect	2870593	8050070	0.3566
				0.778057							0.72861						293-3p perfect	3046132	9545938	0.3191
+miR-290-295	292-iso2-1C bulge 5:3	1051775	2792333	0.3767	0.39617	0.0298401	0.542361	0.0408514			0.602179631305358						293-3p perfect	4194957	11677734	0.3592
	292-iso2-1C bulge 5:3	1085505	2594623	0.4184													293-3p perfect	4224491	12316516	0.343
	292-iso2-1C bulge 5:3	1124425	2859735	0.3932													No site	3548590	8465197	0.4192
				0.408855													No site	3761315	9647657	0.3899
	From SWI 73		0.897874	0.432689													No site	4395357	10251507	0.4288
				0.371878
				0.392499
	From SWJ 52		1.02293	0.341372
				0.429941
	292-iso2-1,2C bulge 5:3	1754438	3049708	0.5753	0.728432	0.144402	0.997232	0.197688
	292-iso2-1,2C bulge 5:3	2385656	3677931	0.6486
	292-iso2-1,2C bulge 5:3	1692533	2936623	0.5764
				0.8372
	From SWI 73		0.897874	0.892441
				0.840652
	No site	2002050	2778176	0.7206	0.788669	0.0916365	1.0797	0.125451
	No site	1954722	2563728	0.7625
	No site	2297764	2613242	0.8793
				0.748435
	From SWI 73		0.897874	0.828624
				0.92151
				0.557319484460859
	From SWJ 52		1.02293	0.634548
				0.813837
+Empty vector	292-iso2-1C bulge 5:3	588371	1253189	0.4695	0.723033	0.129595	0.98984	0.177416
	292-iso2-1C bulge 5:3	945563	1665526	0.5677
	292-iso2-1C bulge 5:3	707397	1201463	0.5888
				0.897342
	From SWI 73		0.897874	0.814814
				0.899235
				0.669558
	From SWJ 55		0.610946	0.623157
				0.612154
				0.634114
	From SWJ 57		1.07094	0.785663
				0.86083
	292-iso2-1,2C bulge 5:3	672557	1364179	0.493	0.675979	0.082262	0.925422	0.112618
	292-iso2-1,2C bulge 5:3	626011	1174511	0.533
	292-iso2-1,2C bulge 5:3	809739	1318049	0.6143
				0.716582
	From SWI 73		0.897874	0.830406
				0.674482
				0.645002
	From SWJ 55		0.610946	0.6163
				0.555228
				0.770723
	From SWJ 57		1.07094	0.709655
				0.627111
	No site	590652	1085330	‘0.5442	0.681444	0.0668675	0.932905	0.0915423
	No site	971216	1583309	0.6134
	No site	576103	931242	0.6186
				0.710122
	From SWI 73		0.897874	0.66624
				0.615677
				0.778449
	From SWJ 52		1.02293	0.656251
				0.834268
				0.668442
	From SWJ 55		0.610946	0.621721
				0.68375
				0.663247
	From SWJ 57		1.07094	0.72861
				0.602179631305358
					0.730454	0.0733768	1	0.100454
+miR-292				+miR-293	N Average	N STD
3-8C9G-B (292-iso2 WT)	0.322022	0.0672188		3-8C9G-B (292-iso2 WT)	1.03193	0.155453
4-8C9G-B (292-iso2 MUT)	0.752703	0.0476674		4-8C9G-B (292-iso2 MUT)	0.983498	0.0426054
No site	1.06524	0.0415273		No site	1.01679	0.023314
+Δ292				+Δ293
3-8C9G-B (292-iso2 WT)	0.849666	0.0739648		3-8C9G-B (292-iso2 WT)	0.414268	0.03103
4-8C9G-B (292-iso2 MUT)	0.881392	0.0354238		4-8C9G-B (292-iso2 MUT)	0.98604	0.135332
No site	1.00803	0.052279		No site	0.97182	0.0946393
+miR-290-295	0.542361	0.0408514		+Empty vector
3-8C9G-B (292-iso2 WT)	0.997232	0.197688		3-8C9G-B (292-iso2 WT)	0.98984	0.177416
4-8C9G-B (292-iso2 MUT)	1.0797	0.125451		4-8C9G-B (292-iso2 MUT)	0.925422	0.112618
No site				No site	0.932905	0.0915423
	+miR-292	+miR-293	+Δ292	+Δ293	+miR-290-295	+Empty vector	No site average
3-7CG-B	0.322022	1.03193	0.849666	0.414268	0.542361	0.98984
4-7CG-B	0.752703	0.983498	0.881392	0.98604	0.997232	0.925422
No site	1.06524	1.01679	1.00803	0.97182	1.0797	0.932905	1

## Sheet: 7B
Ori: SWJ 44															SWJ 55		FF	RL	FF/RL			SWI 33		FF	RL	FF/RL			SWJ 30 B		FF	RL	FF/RL			SWJ 57		FF	RL	FF/RL
		FF	RL	FF/RL	Average	STD	N Average	N STD							+miR-292	292-iso2-1C bulge	447117	3758684	0.119			miR-293 rescue 1:100	293-1C-bulge 4mer	832006	3280932	0.2536			+miR-293, 1:100	293 1C bulge	920779	3811532	0.2416			+Δ293	292-iso1-1C	851122	2420211	0.3517
+miR-292	293 1C bulge			0.629512	0.689648	0.0449882	0.812588	0.053008								292-iso2-1C bulge	881552	7313577	0.1205				293-1C-bulge 4mer	864830	3101440	0.2788				293 1C bulge	834493	3536835	0.2359				292-iso1-1C	932573	2709962	0.3441
From SWJ 55	293 1C bulge			0.690749												292-iso2-1C bulge	555266	4171338	0.1331				293-1C-bulge 4mer	1072738	3794595	0.2827				293 1C bulge	1059029	4587733	0.2308				292-iso1-1C	1176496	3637577	0.3234
0.449078	293 1C bulge			0.762229												292-iso2-1,2C bulge	1674578	4831776	0.3466				293-1,2C-bulge 4mer	2422955	4121713	0.5879				293 1,2C bulge	2965803	5432642	0.5459				292-iso1-1,2C	2056485	3678285	0.5591
				0.690278												292-iso2-1,2C bulge	1598801	5154529	0.3102				293-1,2C-bulge 4mer	2116221	3262970	0.6486				293 1,2C bulge	2293598	5054203	0.4538				292-iso1-1,2C	2534020	4513130	0.5615
	From SWJ 57		0.926293	0.706364												292-iso2-1,2C bulge	1349384	3561214	0.3789				293-1,2C-bulge 4mer	2178603	3684108	0.5914				293 1,2C bulge	2483630	5044999	0.4923				292-iso1-1,2C	2252941	3595029	0.6267
				0.658755												293-1C bulge	2503403	8853986	0.2827				No site	1524972	2489336	0.6126				No site	2977691	4956067	0.6008				No site	3631770	4300793	0.8444
From SWJ 55	293 1,2C bulge			1.0463666279041	0.907053	0.0809805	1.06875	0.0954165								293-1C bulge	2429703	7832531	0.3102				No site	1723840	2810442	0.6134				No site	2462075	4358370	0.5649				No site	5341652	5628254	0.9491
	293 1,2C bulge			0.945939												293-1C bulge	1903276	5560107	0.3423				No site	2533064	3768809	0.6721				No site	2612100	5148223	0.5074				No site	3941024	4549103	0.8663
0.449078	293 1,2C bulge			0.915877												293-1,2C bulge	4145323	8821790	0.4699			Complete mouse rescue 1:100	293-1C-bulge 4mer	818186	4093414	0.1999			+Δ293, 1:100	293 1C bulge	2733292	4909761	0.5567			+Δ292	292-iso2-1C bulge	2482084	4271096	0.5811
				0.764985												293-1,2C bulge	3259252	7672606	0.4248				293-1C-bulge 4mer	919966	4363138	0.2108				293 1C bulge	2920678	5499795	0.5311				292-iso2-1C bulge	2629630	3555611	0.7396
	From SWJ 57		0.926293	0.955961												293-1,2C bulge	2163736	5260647	0.4113				293-1C-bulge 4mer	988324	4503969	0.2194				293 1C bulge	2394473	4626397	0.5176				292-iso2-1C bulge	2767401	3814267	0.7255
				0.952506												292-3p perfect	1000422	8422409	0.1188				293-1,2C-bulge 4mer	2905847	4118389	0.7056				293 1,2C bulge	3199140	5679562	0.5633				292-iso2-1,2C bulge	2489178	3712481	0.6705
From SWJ 55	No site			1.10715787911028	0.887732	0.0705537	1.04598	0.083131								292-3p perfect	793616	5277560	0.1504				293-1,2C-bulge 4mer	2135775	3167826	0.6742				293 1,2C bulge	2541636	5121536	0.4963				292-iso2-1,2C bulge	3708662	5045741	0.735
	No site			1.13187520102927												292-3p perfect	626834	4868542	0.1288				293-1,2C-bulge 4mer	2400494	3734896	0.6427				293 1,2C bulge	2714336	5006969	0.5421				292-iso2-1,2C bulge	3025257	4346133	0.6961
0.449078	No site			1.18286859489819												293-3p perfect	3141498	8198058	0.3832				No site	2318351	3287543	0.7052				No site	3230926	5351829	0.6037				No site	3702274	4462633	0.8296
				0.898312												293-3p perfect	3098278	7579454	0.4088				No site	2925356	4705713	0.6217				No site	3075177	5670349	0.5423				No site	2195880	2714814	0.8089
	From SWJ 57		0.926293	0.952398												293-3p perfect	2378530	4983996	0.4772				No site	2101	1942	1.082				No site	1924461	3603972	0.534				No site	3973376	3549002	‘1.1196
				0.812486												No site	4253573	8554693	0.4972			Mouse rescue Δ293 1:100	293-1C-bulge 4mer	2661353	5007711	0.5315			+miR-290-295, 1:100	293 1C bulge	840652	4308625	0.1951			+miR-292	293-1C bulge	2190418	3425917	0.6394
+miR-293	293 1C bulge			0.333807	0.362573	0.0151825	0.427207	0.017889								No site	4289432	8438675	0.5083				293-1C-bulge 4mer	2549703	4610110	0.5531				293 1C bulge	902162	4948748	0.1823				293-1C bulge	2609843	3988616	0.6543
From SWI 33	293 1C bulge			0.366977												No site	3971484	7476662	0.5312				293-1C-bulge 4mer	3248559	4981067	0.6522				293 1C bulge	1107683	5580499	0.1985				293-1C bulge	3230323	5293908	0.6102
0.75972	293 1C bulge			0.372111						No site	No site avg	STD			+miR-293	292-iso1-1C	2601603	7821471	0.3326				293-1,2C-bulge 4mer	3363060	5643372	0.5959				293 1,2C bulge	2129204	3957688	0.538				293-1,2C bulge	2641026	3727101	0.7086
				0.376076						1.10715787911028	0.848706	0.0769213				292-iso1-1C	3113912	8135903	0.3827				293-1,2C-bulge 4mer	4251718	7187207	0.5916				293 1,2C bulge	1013915	1900465	0.5335				293-1,2C bulge	903166	1019981	0.8855
	From SWJ 30 B		0.642424	0.367203						1.13187520102927						292-iso1-1C	1857434	5671132	0.3275				293-1,2C-bulge 4mer	3505124	5304873	0.6607				293 1,2C bulge	2331062	4757579	0.49				293-1,2C bulge	3086052	3497851	0.8823
				0.359264						1.18286859489819						292-iso1-1,2C	2368231	5741380	0.4125				No site	2677072	4390837	0.6097				No site	2599776	4007042	0.6488				No site	3489472	4193395	0.8321
From SWI 33	293 1,2C bulge			0.773838	0.788079	0.0557799	0.928566	0.0657235		0.80635						292-iso1-1,2C	2202952	5834176	0.3776				No site	3046507	4691417	0.6494				No site	2198903	3862616	0.5693				No site	3901276	4422243	0.8822
0.75972	293 1,2C bulge			0.853736						0.807403						292-iso1-1,2C	2361756	5600187	0.4217				No site	3435018	5316565	0.6461				No site	2767651	4804947	0.576				No site	3071271	4081113	0.7526
	293 1,2C bulge			0.778445						0.884668						No site	2926091	5615614	0.5211			Human rescue 1:100	293-1C-bulge 4mer	633596	2292803	0.2763			+Empty vector, 1:100	293 1C bulge	1302613	2609066	0.4993			+Empty vector	292-iso1-1C	2070056	3124411	0.6625
				0.849751						0.935208						No site	4261542	9192943	0.4636				293-1C-bulge 4mer	765691	2716987	0.2818				293 1C bulge	1168167	2683308	0.4353				292-iso1-1C	1633989	2458787	0.6646
	From SWJ 30 B		0.642424	0.706387						0.879326						No site	3338370	5147906	0.6485				293-1C-bulge 4mer	1052798	3266818	0.3223				293 1C bulge	1238882	2895047	0.4279				292-iso1-1C	1503929	2519838	0.5968
				0.766317						0.789821					+Δ293	292-iso1-1C	1810236	10982731	0.1648				293-1,2C-bulge 4mer	1580527	2690120	0.5875				293 1,2C bulge	1055473	2406127	0.4387				292-iso1-1,2C	1929041	3359729	0.5742
From SWI 33	No site			0.80635	0.850463	0.0577276	1.00207	0.0680184		1.0027						292-iso1-1C	1287841	5740647	0.2243				293-1,2C-bulge 4mer	1658608	2802438	0.5918				293 1,2C bulge	168929	372247	0.4538				292-iso1-1,2C	1625064	2827343	0.5748
0.75972	No site			0.807403						0.7806						292-iso1-1C	1896800	10809901	0.1755				293-1,2C-bulge 4mer	2172164	3164513	0.6864				293 1,2C bulge	1311236	2656762	0.4935				292-iso1-1,2C	1654568	2955704	0.5598
	No site			0.884668						1.399						292-iso1-1,2C	2015654	10456795	0.1928				292-iso1-1C 4mer	741810	2482271	0.2988				No site	718410	1776296	0.4044				292-iso2-1C bulge	1213160	1786495	0.6791
				0.935208						0.871564						292-iso1-1,2C	2250053	12979964	0.1733				292-iso1-1C 4mer	870903	2878447	0.3026				No site	778028	1711938	0.4545				292-iso2-1C bulge	1601412	1903247	0.8414
	From SWJ 30 B		0.642424	0.879326						0.954178						292-iso1-1,2C	1909121	13000364	0.1469				292-iso1-1C 4mer	1399617	4593395	0.3047				No site	1028124	2317614	0.4436				292-iso2-1C bulge	1571190	1704350	0.9219
				0.789821						0.995819						No site	5322695	12739181	0.4178				No site	1512006	2447856	0.6177											292-iso2-1,2C bulge	760704	921658	0.8254
+∆292, 1:100	293 1C bulge	443663	2361276	0.1879	0.166232	0.0277272	0.195865	0.03267		0.8877						No site	3724119	9033569	0.4123				No site	1788622	2674128	0.6689											292-iso2-1,2C bulge	1325330	1743960	0.76
	293 1C bulge	680081	3795681	0.1792						0.8527						No site							No site	2243561	3515230	0.6382											292-iso2-1,2C bulge	1534014	2284285	0.6716
	293 1C bulge	739242	3691476	0.2003						0.7959					+Δ292	293-1C bulge	1217859	20981432	0.058			Empty vector 1:100	293-1C-bulge 4mer	1223516	2406160	0.5085											293-1C bulge	923138	1596249	0.5783
				0.129154						0.802533						293-1C bulge	599257	9448210	0.0634				293-1C-bulge 4mer	1132476	2079034	0.5447											293-1C bulge	1195014	2168962	0.551
	From SWJ 55		0.449078	0.141178						0.854789						293-1C bulge	940268	13113778	0.0717				293-1C-bulge 4mer	1651342	2744557	0.6017											293-1C bulge	1130516	2361248	’0.4788
				0.159661						0.850445						No site	4752318	12140752	0.3914				293-1,2C-bulge 4mer	1265467	2383572	0.5309											293-1,2C bulge	1085674	1609687	0.6745
	293 1,2C bulge	1868811	3960973	0.4718	0.79335	0.077711	0.934776	0.0915642		0.939723						No site	8136894	18987628	0.4285				293-1,2C-bulge 4mer	1365880	2150904	0.635											293-1,2C bulge	691790	1039658	0.6654
	293 1,2C bulge	1822496	2468199	0.7384						0.844147						No site	9127293	20408522	0.4472				293-1,2C-bulge 4mer	1513769	2697311	0.5612											293-1,2C bulge	2141968	2540365	0.8432
	293 1,2C bulge	1527034	1800059	0.8483						0.831227					+Empty vector	292-iso2-1C bulge	4017986	9567895	0.4199				292-iso1-1C 4mer	965691	2338589	0.4129											No site	1249155	1758749	0.7103
	No site	2780529	2772912	1.0027	0.920972	0.0942464	1.08515	0.111047		0.803						292-iso2-1C bulge	4177069	10689169	0.3908				292-iso1-1C 4mer	538603	1390482	0.3874											No site	1111005	1423892	0.7803
	No site	2478386	3175048	0.7806						1.0736						292-iso2-1C bulge	4715617	12282413	0.3839				292-iso1-1C 4mer	990874	2206780	0.449											No site	2206878	3422002	‘0.6449
	No site	3215542	2298523	1.399						0.8351						292-iso2-1,2C bulge	3954902	9776124	0.4045				No site	1220651	1924107	0.6344
				0.871564						0.928237						292-iso2-1,2C bulge	4331025	11205708	0.3865				No site	1049773	1833475	0.5726
	From SWJ 55		0.449078	0.954178						0.818328						292-iso2-1,2C bulge	3186191	9151761	0.3482				No site	1124073	1717491	0.6545
				0.995819												293-1C bulge	3364878	12175887	0.2764
+∆293, 1:100	293 1C bulge	1964748	3116254	0.6305	0.77101	0.0829101	0.908454	0.09769		1.00992543416396						293-1C bulge	3707248	12548092	0.2954
	293 1C bulge	2620713	3482703	0.7525						0.886175						293-1C bulge	4179924	13511561	0.3094
	293 1C bulge	1457528	3695238	0.3944						0.896605						293-1,2C bulge	2693082	7550488	0.3567
				0.6996						0.8216						293-1,2C bulge	110016	432789	0.2542
	From SWI 33		0.75972	0.728032						0.6337						293-1,2C bulge	4274875	14571197	0.2934
				0.858475						0.7164						292-iso1-1C	2724631	8731058	0.3121
				0.866562						0.835045						292-iso1-1C	3368115	9461003	0.356
	From SWJ 30 B		0.642424	0.826713						0.753699						292-iso1-1C	3044208	8833776	0.3446
				0.805699						0.861502						292-iso1-1,2C	2328427	7674948	0.3034
	293 1,2C bulge	2139724	2782703	0.7689	0.788095	0.0654059	0.928584	0.0770655		0.629491130665697						292-iso1-1,2C	3694462	10456935	0.3533
	293 1,2C bulge	2373845	3397063	0.6988						0.707477						292-iso1-1,2C	2703383	7863844	0.3438
	293 1,2C bulge	2918429	4173887	0.6992						0.69051						292-3p perfect	3020448	9767200	0.3092
				0.784368						0.933469						292-3p perfect	2860600	9342485	0.3062
	From SWI 33		0.75972	0.778708						0.868224						292-3p perfect	2870593	8050070	0.3566
				0.869663						0.954846						293-3p perfect	3046132	9545938	0.3191
				0.876836						0.898312						293-3p perfect	4194957	11677734	0.3592
	From SWJ 30 B		0.642424	0.772543						0.952398						293-3p perfect	4224491	12316516	0.343
				0.843836						0.812486						No site	3548590	8465197	0.4192
	No site	3279821	3694890	0.8877	0.851018	0.0433865	1.00272	0.0511208		0.76682						No site	3761315	9647657	0.3899
	No site	3138494	3680629	0.8527						0.84239						No site	4395357	10251507	0.4288
	No site	2943029	3697617	0.7959						0.696216
				0.802533
	From SWI 33		0.75972	0.854789
				0.850445
				0.939723
	From SWJ 30 B		0.642424	0.844147
				0.831227
+290-295, 1:100	293 1C bulge	671773	2365524	0.284	0.286326	0.0307172	0.337368	0.036193
	293 1C bulge	773927	2285037	0.3387
	293 1C bulge	756982	3313689	0.2284
				0.263123
	From SWI 33		0.75972	0.277471
				0.288791
				0.303694
	From SWJ 30 B		0.642424	0.283769
				0.308986
	293 1,2C bulge	2212184	2760002	0.8015	0.830301	0.0775131	0.978314	0.091331
	293 1,2C bulge	2293969	2539590	0.9033
	293 1,2C bulge	2522385	3736054	0.6751
				0.928764
	From SWI 33		0.75972	0.887433
				0.84597
				0.837454
	From SWJ 30 B		0.642424	0.830449
				0.762737
	No site	2237696	2786713	0.803	0.861241	0.0495533	1.01477	0.0583869
	No site	2578933	2402085	1.0736
	No site	2472457	2960774	0.8351
				0.928237
	From SWI 33		0.75972	0.818328
				1.00992543416396
	From SWJ 30 B		0.642424	0.886175
				0.896605
+Empty vector, 1:100	293 1C bulge	1544817	2237767	0.6903	0.682808	0.0574868	0.804529	0.0677346
	293 1C bulge	2688	2222	1.2096
	293 1C bulge	1400995	2194978	0.6383
				0.669326
	From SWI 33		0.75972	0.716975
				0.792003
				0.777213
	From SWJ 30 B		0.642424	0.67759
				0.666071
				0.615483583640547
	From SWJ 55		0.449078	0.657793
				0.688968
				0.624316
	From SWJ 57		0.926293	0.594844
				0.516898964933485
	293 1,2C bulge	1690908	1876923	0.9009	0.751781	0.0805727	0.885798	0.094936
	293 1,2C bulge	1486316	2167975	0.6856
	293 1,2C bulge	1918773	2728697	0.7032
				0.69881
	From SWI 33		0.75972	0.835835
				0.738694
				0.682883
	From SWJ 30 B		0.642424	0.706387
				0.768185
				0.794294
	From SWJ 55		0.449078	0.566048939802558
				0.653339
				0.728171
	From SWJ 57		0.926293	0.718347
				0.910295
	No site	2124708	2586164	0.8216	0.803707	0.0890198	0.94698	0.104889
	No site	1201801	1896562	0.6337
	No site	1531495	2137770	0.7164
				0.835045
	From SWI 33		0.75972	0.753699
				0.861502
				0.629491130665697
	From SWJ 30 B		0.642424	0.707477
				0.69051
				0.933469
	From SWJ 55		0.449078	0.868224
				0.954846
				0.76682
	From SWJ 57		0.926293	0.84239
				0.696216
					0.848706	0.0769213	1	0.0906337
+miR-292, 1:100	N Average	N STD		+miR-293, 1:100	N Average	N STD		+Δ292, 1:100	N Average	N STD
4-8C9G10C-B (293 WT)	0.812588	0.053008		4-8C9G10C-B (293 WT)	0.427207	0.017889		4-8C9G10C-B (293 WT)	0.195865	0.03267
5-8C9G10C-B (293 MUT)	1.06875	0.0954165		5-8C9G10C-B (293 MUT)	0.928566	0.0657235		5-8C9G10C-B (293 MUT)	0.934776	0.0915642
No site	1.04598	0.083131		No site	1.00207	0.0680184		No site	1.08515	0.111047
+Δ293, 1:100	N Average	N STD		+miR-290-295, 1:100	N Average	N STD		+Empty vector, 1:100
4-8C9G10C-B (293 WT)	0.908454	0.09769		4-8C9G10C-B (293 WT)	0.337368	0.036193		4-8C9G10C-B (293 WT)	0.804529	0.0677346
5-8C9G10C-B (293 MUT)	0.928584	0.0770655		5-8C9G10C-B (293 MUT)	0.978314	0.091331		5-8C9G10C-B (293 MUT)	0.885798	0.094936
No site	1.00272	0.0511208		No site	1.01477	0.0583869		No site	0.94698	0.104889
	+miR-292	+miR-293	+Δ292	+Δ293	+miR-290-295	+Empty vector	No site average
4-7CGC-B	0.812588	0.427207	0.195865	0.908454	0.337368	0.804529
5-7CGC-B	1.06875	0.928566	0.934776	0.928584	0.978314	0.885798
No site	1.04598	1.00207	1.08515	1.00272	1.01477	0.94698	1

## Sheet: 7C
SWJ 40		FF	RL	FF/RL	Average	STD	N Average	N STD						SWJ 8		FF	RL	FF/RL			SWJ 13		FF	RL	FF/RL			SWI 73		FF	RL	FF/RL
+miR-371, 1:100	292-iso2-1C bulge 5:3	2454	50343	0.0488	1.10467	0.121984	0.654908	0.0723188						+miR-371, 1:100	292-iso2-1C-bulg 5:3	691413	1960825	0.3526			+miR-371, 1:100	292-iso1-1C 4mer	1406022	1677541	0.8381			miR-293 rescue 1:100	292-iso2-1C-bulge 5:3 4mer	930842	1664122	0.5594
	292-iso2-1C bulge 5:3	2396475	3181517	0.7532											292-iso2-1C-bulg 5:3	925299	2493610	0.3711				292-iso1-1C 4mer	1435395	1617614	0.8874				292-iso2-1C-bulge 5:3 4mer	1859655	2502685	0.7431
	292-iso2-1C bulge 5:3	2725861	3672722	0.7422											292-iso2-1C-bulg 5:3	914482	2082112	0.4392				292-iso1-1C 4mer	1170903	1183018	0.9898				292-iso2-1C-bulge 5:3 4mer	3291169	4521459	0.7279
				0.956642											292-iso2-1,2C-bulg 5:3	1192750	2385831	0.4999				292-iso1-1,2C 4mer	1635197	1668171	0.9802				292-iso2-1,2C-bulge 5:3 4mer	1553982	2458523	0.6321
	SWJ 8	0.368581		1.00683											292-iso2-1,2C-bulg 5:3	1042172	1533700	0.6795				292-iso1-1,2C 4mer	3091388	2777418	1.113				292-iso2-1,2C-bulge 5:3 4mer	2483208	3667339	0.6771
				1.1916											292-iso2-1,2C-bulg 5:3	1316427	2411766	0.5458				292-iso1-1,2C 4mer	2246690	2399859	0.9362				292-iso2-1,2C-bulge 5:3 4mer	2168430	3464379	0.6259
															293-1C-bulg 4mer	582213	2479632	0.2348				292-iso2-1C-bulg 5:3	2917823	2352570	1.2403				No site	1652695	2518092	0.6563
	SWJ 13	0.743029		1.12149											293-1C-bulg 4mer	324579	1225968	0.2648				292-iso2-1C-bulg 5:3	1432752	1719359	0.8333				No site	1927243	2920311	0.6599
				1.24679											293-1C-bulg 4mer	379342	1450807	0.2615				292-iso2-1C-bulg 5:3	1535774	1657737	0.9264				No site	2836768	4144889	0.6844
	292-iso2-1,2C bulge 5:3	5407168	4733988	1.1422	1.67698	0.199214	0.994204	0.118105							293-1,2C-bulg 4mer	1390209	2050369	0.678				292-iso2-1,2C-bulg 5:3	1770875	1365987	1.2964			Complete mouse rescue 1:100	292-iso2-1C-bulge 5:3 4mer	1235939	3366391	0.3671
	292-iso2-1,2C bulge 5:3	5484639	4296502	1.2765											293-1,2C-bulg 4mer	1292514	2040723	0.6334				292-iso2-1,2C-bulg 5:3	2484993	1743588	1.4252				292-iso2-1C-bulge 5:3 4mer	1401497	3607794	0.3885
	292-iso2-1,2C bulge 5:3	7586173	5365610	1.4139											293-1,2C-bulg 4mer	1194126	2152516	0.5548				292-iso2-1,2C-bulg 5:3	2053859	1664373	1.234				292-iso2-1C-bulge 5:3 4mer	1656379	4960070	0.3339
				1.35628340457497											No site	1835123	2577918	0.7119				No site	1931191	1453242	1.3289				292-iso2-1,2C-bulge 5:3 4mer	2706711	3600775	0.7517
	SWJ 8	0.368581		1.84356											No site	1289407	1896876	0.6798				No site	2241665	1632579	1.3731				292-iso2-1,2C-bulge 5:3 4mer	3021721	3771101	0.8013
				1.48082											No site	1167562	1665394	0.7011				No site	3196954	2571320	1.2433				292-iso2-1,2C-bulge 5:3 4mer	2877328	3811888	0.7548
				1.74475						No site	No site avg	STD		+miR-372-373, 1:100	292-iso2-1C-bulg 5:3	1383900	2646879	0.5228			+miR-372-373, 1:100	292-iso1-1C 4mer	1145345	2278976	0.5026				No site	2701999	4020548	0.672
	SWJ 13	0.743029		1.91809						1.6345	1.68676	0.15306			292-iso2-1C-bulg 5:3	1464719	2545804	0.5753				292-iso1-1C 4mer	1406421	2546532	0.5523				No site	2995698	4026358	0.744
				1.66077						1.872					292-iso2-1C-bulg 5:3	1207580	2849255	0.4238				292-iso1-1C 4mer	1179807	1950352	0.6049				No site	4462183	5393178	0.8274
	No site	5359515	3278938	1.6345	1.82982	0.113503	1.08481	0.0672906		1.9741					292-iso2-1,2C-bulg 5:3	1901571	3633891	0.5233				292-iso1-1,2C 4mer	1823733	2184807	0.8347			Mouse rescue Δ293 1:100	292-iso2-1C-bulge 5:3 4mer	1549738	5531656	0.2802
	No site	9476002	5061978	1.872						1.93146					292-iso2-1,2C-bulg 5:3	2303404	4111536	0.5602				292-iso1-1,2C 4mer	1975849	2397140	0.8243				292-iso2-1C-bulge 5:3 4mer	1355809	5340687	0.2539
	No site	8679946	4396870	1.9741						1.84437					292-iso2-1,2C-bulg 5:3	2778959	4687299	0.5929				292-iso1-1,2C 4mer	1818453	1809109	1.0052				292-iso2-1C-bulge 5:3 4mer	768906	3189984	0.241
				1.93146						1.90216					293-1C-bulg 4mer	1744254	2726866	0.6397				292-iso2-1C-bulg 5:3	1748262	1989294	0.8788				292-iso2-1,2C-bulge 5:3 4mer	1836397	2482654	0.7397
	SWJ 8	0.368581		1.84437						1.78849					293-1C-bulg 4mer	1575530	3400846	0.4633				292-iso2-1C-bulg 5:3	3061430	2518350	1.2156				292-iso2-1,2C-bulge 5:3 4mer	1973015	3504933	0.5629
				1.90216						1.84798					293-1C-bulg 4mer	1597629	3136932	0.5093				292-iso2-1C-bulg 5:3	2508057	2144831	1.1693				292-iso2-1,2C-bulge 5:3 4mer	2476725	3884776	0.6375
				1.78849						1.67328					293-1,2C-bulg 4mer	1375531	2466929	0.5576				292-iso2-1,2C-bulg 5:3	3129276	2784874	1.1237				No site	2153891	3382255	0.6368
	SWJ 13	0.743029		1.84798						1.6163					293-1,2C-bulg 4mer	1617569	3436727	0.4707				292-iso2-1,2C-bulg 5:3	3134025	2462862	1.2725				No site	2899260	4721001	0.6141
				1.67328						1.3716					293-1,2C-bulg 4mer	1180292	2095649	0.5632				292-iso2-1,2C-bulg 5:3	3745571	3149378	1.1893				No site	2672173	4889734	0.5465
+Δ371, 1:100	292-iso2-1C bulge 5:3	4577953	4319372	1.0599	1.50851	0.117641	0.894328	0.0697441		1.5927					No site	1262945	2371790	0.5325				No site	3212104	2579305	1.2453			Human rescue 1:100	292-iso2-1C-bulge 5:3 4mer	784240	1805856	0.4343
	292-iso2-1C bulge 5:3	6243978	5072655	1.2309						1.44473					No site	1575539	2710597	0.5813				No site	4605711	3436606	1.3402				292-iso2-1C-bulge 5:3 4mer	1293752	2765210	0.4679
	292-iso2-1C bulge 5:3	7408696	5473233	1.3536						1.57713					No site	1737646	2658949	0.6535				No site	2610622	2029319	1.2865				292-iso2-1C-bulge 5:3 4mer	1232125	2292813	0.5374
				1.41841						1.77302				+miR-371-373, 1:100	292-iso2-1C-bulg 5:3	868450	1997996	0.4347			+miR-371-373, 1:100	292-iso1-1C 4mer	1540616	2448449	0.6292				292-iso2-1,2C-bulge 5:3 4mer	2175096	2893207	0.7518
	SWJ 8	0.368581		1.56085						1.67598					292-iso2-1C-bulg 5:3	1205056	2601249	0.4633				292-iso1-1C 4mer	1667941	2539062	0.6569				292-iso2-1,2C-bulge 5:3 4mer	1998736	2720889	0.7346
										1.8037					292-iso2-1C-bulg 5:3	1074435	2558591	0.4199				292-iso1-1C 4mer	1300340	2459076	0.5288				292-iso2-1,2C-bulge 5:3 4mer	1825079	2794623	0.6531
				1.63601						1.73143					292-iso2-1,2C-bulg 5:3	1240370	2329627	0.5324				292-iso1-1,2C 4mer	2292616	2709420	0.8462				No site	1148657	1632171	0.7038
	SWJ 13	0.743029		1.57369						1.7915					292-iso2-1,2C-bulg 5:3	1544218	2408892	0.641				292-iso1-1,2C 4mer	2201768	2493911	0.8829				No site	1726603	2417290	0.7143
										1.7879					292-iso2-1,2C-bulg 5:3	1514929	2406732	0.6295				292-iso1-1,2C 4mer	2609481	2878968	0.9064				No site	2131338	3283511	0.6491
	292-iso2-1,2C bulge 5:3	8466420	5766216	1.4683	1.53827	0.0961164	0.91197	0.056983		1.8327					293-1C-bulg 4mer	570082	2167282	0.263				292-iso2-1C-bulg 5:3	1843848	2652050	0.6953			Empty vector rescue 1:100	292-iso2-1C-bulge 5:3 4mer	1727115	2143738	0.8057
	292-iso2-1,2C bulge 5:3	12225208	8350097	1.4641						1.59694					293-1C-bulg 4mer	651457	2099165	0.3103				292-iso2-1C-bulg 5:3	1980284	2373486	0.8343				292-iso2-1C-bulge 5:3 4mer	1426390	1949737	0.7316
	292-iso2-1,2C bulge 5:3	10287319	5178477	1.9866						1.77627					293-1C-bulg 4mer	622144	1809151	0.3439				292-iso2-1C-bulg 5:3	2381346	3109089	0.7659				292-iso2-1C-bulge 5:3 4mer	1135147	1405876	0.8074
				1.41977											293-1,2C-bulg 4mer	1179483	1850581	0.6374				292-iso2-1,2C-bulg 5:3	2875805	2558679	1.1239				292-iso2-1,2C-bulge 5:3 4mer	1543728	2399366	0.6434
	SWJ 8	0.368581		1.51988						1.52874					293-1,2C-bulg 4mer	1478596	2687584	0.5502				292-iso2-1,2C-bulg 5:3	3879334	3200406	1.2121				292-iso2-1,2C-bulge 5:3 4mer	1240581	1663769	0.7456
				1.6086						1.89037					293-1,2C-bulg 4mer	1632208	2847924	0.5731				292-iso2-1,2C-bulg 5:3	2761550	2524046	1.0941				292-iso2-1,2C-bulge 5:3 4mer	811461	1339900	0.6056
				1.51232						1.5741					No site	510044	1779015	0.2867				No site	3436740	3025495	1.1359				No site	1154504	1810660	0.6376
	SWJ 13	0.743029		1.71258						1.6416					No site	1490499	2532449	0.5886				No site	4619311	3288596	1.4046				No site	1164774	1947207	0.5982
				1.60061						1.7178					No site	1660051	2535678	0.6547				No site	4247956	3631920	1.1696				No site	1286950	2328004	0.5528
	No site	8189243	5066671	1.6163	1.62073	0.144794	0.960856	0.0858415		1.5245				+Empty vector, 1:100	292-iso2-1C-bulg 5:3	1231575	1584541	0.7772			+Empty vector, 1:100	292-iso1-1C 4mer	1635718	1812956	0.9022
	No site	7356711	5363745	1.3716						1.68315					292-iso2-1C-bulg 5:3	1004635	1525885	0.6584				292-iso1-1C 4mer	1817900	2150648	0.8453
	No site	8096791	5083550	1.5927						1.57914					292-iso2-1C-bulg 5:3	955242	1564128	0.6107				292-iso1-1C 4mer	1734917	2130563	0.8143
				1.44473						1.45929					292-iso2-1,2C-bulg 5:3	2323	2397	0.9692				292-iso1-1,2C 4mer	1485903	1742020	0.853
	SWJ 8	0.368581		1.57713						1.48923					292-iso2-1,2C-bulg 5:3	1416871	2038052	0.6952				292-iso1-1,2C 4mer	1663301	2009635	0.8277
				1.77302						1.55488					292-iso2-1,2C-bulg 5:3	1161097	1848789	0.628				292-iso1-1,2C 4mer	1773244	2181218	0.813
				1.67598						1.77058					293-1C-bulg 4mer	1268062	2252725	0.5629				292-iso2-1C-bulg 5:3	3239902	2556458	1.2673
	SWJ 13	0.743029		1.8037						1.51326					293-1C-bulg 4mer	1355651	2483637	0.5458				292-iso2-1C-bulg 5:3	2387007	2045868	1.1667
				1.73143						1.51044					293-1C-bulg 4mer	1153603	2230190	0.5173				292-iso2-1C-bulg 5:3	2904920	2247834	1.2923
+miR-371-373, 1:100	292-iso2-1C bulge 5:3	3156164	3857905	0.8181	1.05565	0.156879	0.625845	0.0930064		1.81944					293-1,2C-bulg 4mer	908079	1770390	0.5129				292-iso2-1,2C-bulg 5:3	2257208	1806833	1.2493
	292-iso2-1C bulge 5:3	3501540	4092693	0.8556											293-1,2C-bulg 4mer	1534139	2707211	0.5667				292-iso2-1,2C-bulg 5:3	3443780	2394222	1.4384
	292-iso2-1C bulge 5:3	3675834	4121645	0.8918											293-1,2C-bulg 4mer	1104784	1966838	0.5617				292-iso2-1,2C-bulg 5:3	2995392	2358767	1.2699
				1.14647											No site	1004210	1829520	0.5489				No site	2248860	2000094	1.1244
	SWI 73	0.378814		1.23517											No site	909220	1586449	0.5731				No site	2273927	2026181	1.1223
				1.41863676539239											No site	941280	1442425	0.6526				No site	2001250	1480330	1.3519
				1.17939
	SWJ 8	0.368581		1.25698
				1.13923
				0.935764
	SWJ 13	0.743029		1.12284
				1.03078
	292-iso2-1,2C bulge 5:3	7798316	5270684	1.4796	1.60514	0.119375	0.951613	0.0707718
	292-iso2-1,2C bulge 5:3	8643461	4978515	1.7362
	292-iso2-1,2C bulge 5:3	8819773	5499532	1.6037
				1.9846131749572
	SWI 73	0.378814		1.93920835105555
				1.72406
				1.44446
	SWJ 8	0.368581		1.7391
				1.7079
				1.51259
	SWJ 13	0.743029		1.63129
				1.47249
	No site	8355991	4664119	1.7915	1.72231	0.135006	1.02108	0.0800386
	No site	10090745	5644023	1.7879
	No site	9143660	4989187	1.8327
				1.59694
	SWJ 8	0.368581		1.77627
				1.52874
	SWJ 13	0.743029		1.89037
				1.5741
+Empty vector, 1:100	292-iso2-1C bulge 5:3	5566929	4390275	1.268	1.6802	0.140714	0.996113	0.083423
	292-iso2-1C bulge 5:3	7012323	4594348	1.5263
	292-iso2-1C bulge 5:3	7137402	4677937	1.5258
				2.12689922195134
	SWI 73	0.378814		1.93129
				2.13138690803464
				2.10862864980129
	SWJ 8	0.368581		1.78631
				1.6569
				1.70559
	SWJ 13	0.743029		1.57019
				1.73923
	292-iso2-1,2C bulge 5:3	9093667	5056785	1.7983	1.75131	0.0997197	1.03827	0.0591192
	292-iso2-1,2C bulge 5:3	7925371	4536058	1.7472
	292-iso2-1,2C bulge 5:3	8216694	4683971	1.7542
				1.69846
	SWI 73	0.378814
				1.59867
				1.88615
	SWJ 8	0.368581		1.70383
				1.68136
	SWJ 13	0.743029		1.93586
				1.70908
	No site	8180171	4983058	1.6416	1.60528	0.118791	0.951694	0.0704256
	No site	8597807	5005229	1.7178
	No site	7172113	4704461	1.5245
				1.68315
	SWI 73	0.378814		1.57914
				1.45929
				1.48923
	SWJ 8	0.368581		1.55488
				1.77058
				1.51326
	SWJ 13	0.743029		1.51044
				1.81944
					1.68676	0.15306	1	0.090742
+miR-371	N Average	N STD		+Δ371	N Average	N STD
3-8C9G-B (292-iso2 WT)	0.654908	0.0723188		3-8C9G-B (292-iso2 WT)	0.894328	0.0697441							+miR-371	+Δ371	+miR-371-373	+Empty vector	No site average
4-8C9G-B (292-iso2 MUT)	0.994204	0.118105		4-8C9G-B (292-iso2 MUT)	0.91197	0.056983						3-7CG-B	0.654908	0.894328	0.625845	0.996113
No site	1.08481	0.0672906		No site	0.960856	0.0858415						4-7CG-B	0.994204	0.91197	0.951613	1.03827
												No site	1.08481	0.960856	1.02108	0.951694	1
+miR-371-373	N Average	N STD		+Empty vector	N Average	N STD
3-8C9G-B	0.625845	0.0930064		3-8C9G-B (292-iso2 WT)	0.996113	0.083423
4-8C9G-B	0.951613	0.0707718		4-8C9G-B (292-iso2 MUT)	1.03827	0.0591192
No site	1.02108	0.0800386		No site	0.951694	0.0704256
												1	0.090742

## Sheet: 7D
Original: SWJ 40 B
Rescue	Target
		FF	RL	FF/RL	Average	STD	N Average	N STD
+miR-371, 1:100	293 1C bulge	2002030	4839854	0.4137	0.588341	0.122007	0.348258	0.0722199
	293 1C bulge	2395337	4856309	0.4932															SWJ 8		FF	RL	FF/RL
	293 1C bulge	2855155	5114553	0.5582															+miR-371, 1:100	292-iso2-1C-bulg 5:3	691413	1960825	0.3526
				0.637038																292-iso2-1C-bulg 5:3	925299	2493610	0.3711
	SWJ 8	0.368581		0.718431																292-iso2-1C-bulg 5:3	914482	2082112	0.4392
				0.709478																292-iso2-1,2C-bulg 5:3	1192750	2385831	0.4999
	293 1,2C bulge	4312334	2757108	1.5641	1.71772	0.160388	1.01677	0.0949385												292-iso2-1,2C-bulg 5:3	1042172	1533700	0.6795
	293 1,2C bulge	8972778	5121962	1.7518																292-iso2-1,2C-bulg 5:3	1316427	2411766	0.5458
	293 1,2C bulge	9550217	4955381	1.9272									No site	No site avg	STD					293-1C-bulg 4mer	582213	2479632	0.2348
				1.83949									1.6345	1.68939	0.140736					293-1C-bulg 4mer	324579	1225968	0.2648
	SWJ 8	0.368581		1.71848									1.872							293-1C-bulg 4mer	379342	1450807	0.2615
				1.50523									1.9741							293-1,2C-bulg 4mer	1390209	2050369	0.678
	No site	5359515	3278938	1.6345	1.85977	0.119282	1.10085	0.070607					1.93146							293-1,2C-bulg 4mer	1292514	2040723	0.6334
	No site	9476002	5061978	1.872									1.84437							293-1,2C-bulg 4mer	1194126	2152516	0.5548
	No site	8679946	4396870	1.9741									1.90216							No site	1835123	2577918	0.7119
				1.93146									1.6163							No site	1289407	1896876	0.6798
	SWJ 8	0.368581		1.84437									1.3716							No site	1167562	1665394	0.7011
				1.90216									1.5927						+miR-372-373, 1:100	292-iso2-1C-bulg 5:3	1383900	2646879	0.5228
+Δ371, 1:100	293 1C bulge	2854640	2540606	1.1236	1.52067	0.196476	0.900132	0.116301					1.44473							292-iso2-1C-bulg 5:3	1464719	2545804	0.5753
	293 1C bulge	8192029	4981390	1.6445									1.57713							292-iso2-1C-bulg 5:3	1207580	2849255	0.4238
	293 1C bulge	8086067	5103176	1.5845									1.77302							292-iso2-1,2C-bulg 5:3	1901571	3633891	0.5233
				1.73558									1.7915							292-iso2-1,2C-bulg 5:3	2303404	4111536	0.5602
	SWJ 8	0.368581		1.25698									1.7879							292-iso2-1,2C-bulg 5:3	2778959	4687299	0.5929
				1.38179									1.8327							293-1C-bulg 4mer	1744254	2726866	0.6397
	293 1,2C bulge	5191149	28956116	0.1793	1.46736	0.107027	0.868578	0.0633529					1.66054							293-1C-bulg 4mer	1575530	3400846	0.4633
	293 1,2C bulge	7408380	4867467	1.522									1.79818							293-1C-bulg 4mer	1597629	3136932	0.5093
	293 1,2C bulge	8186841	5469285	1.4969									1.71565							293-1,2C-bulg 4mer	1375531	2466929	0.5576
				1.51283									1.69779							293-1,2C-bulg 4mer	1617569	3436727	0.4707
	SWJ 8	0.368581		1.27706									1.63711							293-1,2C-bulg 4mer	1180292	2095649	0.5632
				1.52802									1.79811							No site	1262945	2371790	0.5325
	No site	8189243	5066671	1.6163	1.56258	0.140464	0.92494	0.0831449												No site	1575539	2710597	0.5813
	No site	7356711	5363745	1.3716									1.59694							No site	1737646	2658949	0.6535
	No site	8096791	5083550	1.5927									1.77627						+miR-371-373, 1:100	292-iso2-1C-bulg 5:3	868450	1997996	0.4347
				1.44473									1.6416							292-iso2-1C-bulg 5:3	1205056	2601249	0.4633
	SWJ 8	0.368581		1.57713									1.7178							292-iso2-1C-bulg 5:3	1074435	2558591	0.4199
				1.77302									1.5245	SWJ 8	0.368581					292-iso2-1,2C-bulg 5:3	1240370	2329627	0.5324
+miR-371-373, 1:100	293 1C bulge	3367092	4822539	0.6982	0.814211	0.0987239	0.481957	0.0584378					1.70544							292-iso2-1,2C-bulg 5:3	1544218	2408892	0.641
	293 1C bulge	3706776	5092310	0.7279									1.5393							292-iso2-1,2C-bulg 5:3	1514929	2406732	0.6295
	293 1C bulge	3831879	5284138	0.7252									1.75947							293-1C-bulg 4mer	570082	2167282	0.263
				0.757555									1.58465							293-1C-bulg 4mer	651457	2099165	0.3103
	SWI 33	0.371986		0.86643									1.58465							293-1C-bulg 4mer	622144	1809151	0.3439
													1.62961							293-1,2C-bulg 4mer	1179483	1850581	0.6374
				1.00228									1.48923							293-1,2C-bulg 4mer	1478596	2687584	0.5502
	SWI 39	0.413656		0.859168									1.55488							293-1,2C-bulg 4mer	1632208	2847924	0.5731
				0.831125									1.77058							No site	510044	1779015	0.2867
				0.713548																No site	1490499	2532449	0.5886
	SWJ 8	0.368581		0.841878																No site	1660051	2535678	0.6547
				0.933038															+Empty vector, 1:100	292-iso2-1C-bulg 5:3	1231575	1584541	0.7772
	293 1,2C bulge	7204406	4399381	1.6376	1.6821	0.125147	0.995689	0.0740783												292-iso2-1C-bulg 5:3	1004635	1525885	0.6584
	293 1,2C bulge	7919657	4783059	1.6558																292-iso2-1C-bulg 5:3	955242	1564128	0.6107
	293 1,2C bulge	8118646	4681976	1.734																292-iso2-1,2C-bulg 5:3	2323	2397	0.9692
				1.57936																292-iso2-1,2C-bulg 5:3	1416871	2038052	0.6952
	SWI 33	0.371986		1.59092																292-iso2-1,2C-bulg 5:3	1161097	1848789	0.628
				1.84523																293-1C-bulg 4mer	1268062	2252725	0.5629
				1.82422																293-1C-bulg 4mer	1355651	2483637	0.5458
	SWI 39	0.413656		2.12108559675473																293-1C-bulg 4mer	1153603	2230190	0.5173
				1.85903																293-1,2C-bulg 4mer	908079	1770390	0.5129
				1.72934																293-1,2C-bulg 4mer	1534139	2707211	0.5667
	SWJ 8	0.368581		1.49275																293-1,2C-bulg 4mer	1104784	1966838	0.5617
				1.55488																No site	1004210	1829520	0.5489
i	No site	8355991	4664119	1.7915	1.7357	0.0782025	1.02742	0.0462905												No site	909220	1586449	0.5731
	No site	10090745	5644023	1.7879																No site	941280	1442425	0.6526
	No site	9143660	4989187	1.8327
				1.66054
	SWI 33	0.371986		1.79818
				1.71565															SWI 33		FF	RL	FF/RL
				1.69779															miR-293 rescue 1:100	293-1C-bulge 4mer	832006	3280932	0.2536
	SWI 39	0.413656		1.63711																293-1C-bulge 4mer	864830	3101440	0.2788
				1.79811																293-1C-bulge 4mer	1072738	3794595	0.2827
				0.777848473878065																293-1,2C-bulge 4mer	2422955	4121713	0.5879
	SWJ 8	0.368581		1.59694																293-1,2C-bulge 4mer	2116221	3262970	0.6486
				1.77627																293-1,2C-bulge 4mer	2178603	3684108	0.5914
+Empty vector, 1:100	293 1C bulge	8295669	7074474	1.1726	1.55216	0.142055	0.91877	0.0840871												No site	1524972	2489336	0.6126
	293 1C bulge	6182390	4998547	1.2368																No site	1723840	2810442	0.6134
	293 1C bulge	5102932	4196159	1.2161																No site	2533064	3768809	0.6721
				1.36699															Complete mouse rescue 1:100	293-1C-bulge 4mer	818186	4093414	0.1999
	SWI 33	0.371986		1.4643																293-1C-bulge 4mer	919966	4363138	0.2108
				1.61753																293-1C-bulge 4mer	988324	4503969	0.2194
				1.61027																293-1,2C-bulge 4mer	2905847	4118389	0.7056
	SWI 39	0.413656		1.80488																293-1,2C-bulge 4mer	2135775	3167826	0.6742
				1.69392																293-1,2C-bulge 4mer	2400494	3734896	0.6427
				1.52721																No site	2318351	3287543	0.7052
	SWJ 8	0.368581		1.48082																No site	2925356	4705713	0.6217
				1.40349																No site	2101	1942	1.082
	293 1,2C bulge	7599327	4676875	1.6249	1.51113	0.122575	0.894487	0.0725557											Mouse rescue Δ293 1:100	293-1C-bulge 4mer	2661353	5007711	0.5315
	293 1,2C bulge	7488334	5449585	1.3741																293-1C-bulge 4mer	2549703	4610110	0.5531
	293 1,2C bulge	5940390	4094600	1.4508																293-1C-bulge 4mer	3248559	4981067	0.6522
				1.4272																293-1,2C-bulge 4mer	3363060	5643372	0.5959
	SWI 33	0.371986		1.70705																293-1,2C-bulge 4mer	4251718	7187207	0.5916
				1.50866																293-1,2C-bulge 4mer	3505124	5304873	0.6607
				1.72293																No site	2677072	4390837	0.6097
	SWI 39	0.413656		1.35475																No site	3046507	4691417	0.6494
				1.51019																No site	3435018	5316565	0.6461
				1.39155															Human rescue 1:100	293-1C-bulge 4mer	633596	2292803	0.2763
	SWJ 8	0.368581		1.53752																293-1C-bulge 4mer	765691	2716987	0.2818
				1.52395																293-1C-bulge 4mer	1052798	3266818	0.3223
	No site	8180171	4983058	1.6416	1.62514	0.0947271	0.961973	0.0560719												293-1,2C-bulge 4mer	1580527	2690120	0.5875
	No site	8597807	5005229	1.7178																293-1,2C-bulge 4mer	1658608	2802438	0.5918
	No site	7172113	4704461	1.5245																293-1,2C-bulge 4mer	2172164	3164513	0.6864
				1.70544																292-iso1-1C 4mer	741810	2482271	0.2988
	SWI 33	0.371986		1.5393																292-iso1-1C 4mer	870903	2878447	0.3026
				1.75947																292-iso1-1C 4mer	1399617	4593395	0.3047
				1.58465																No site	1512006	2447856	0.6177
	SWI 39	0.413656		1.58465																No site	1788622	2674128	0.6689
				1.62961																No site	2243561	3515230	0.6382
				1.48923															Empty vector 1:100	293-1C-bulge 4mer	1223516	2406160	0.5085
	SWJ 8	0.368581		1.55488																293-1C-bulge 4mer	1132476	2079034	0.5447
				1.77058																293-1C-bulge 4mer	1651342	2744557	0.6017
					1.68939	0.140736	1	0.0833063												293-1,2C-bulge 4mer	1265467	2383572	0.5309
	N Average	N STD																		293-1,2C-bulge 4mer	1365880	2150904	0.635
																				293-1,2C-bulge 4mer	1513769	2697311	0.5612
																				292-iso1-1C 4mer	965691	2338589	0.4129
																				292-iso1-1C 4mer	538603	1390482	0.3874
																				292-iso1-1C 4mer	990874	2206780	0.449
																				No site	1220651	1924107	0.6344
																				No site	1049773	1833475	0.5726
+miR-371	N Average	N STD		+Δ371	N Average	N STD														No site	1124073	1717491	0.6545
4-8C9G10C-B (293 WT)	0.348258	0.0722199		4-8C9G10C-B (293 WT)	0.900132	0.116301
5-8C9G10C-B (293 MUT)	1.01677	0.0949385		5-8C9G10C-B (293 MUT)	0.868578	0.0633529					+miR-371	+Δ371	+miR-371-373	+Empty vector	No site average
No site	1.10085	0.070607		No site	0.92494	0.0831449				4-7CGC-B	0.348258	0.900132	0.481957	0.91877
										5-7CGC-B	1.01677	0.868578	0.995689	0.894487					SWI 39		FF	RL	FF/RL
										No site	1.10085	0.92494	1.02742	0.961973	1				Human rescue 1:100	293-1C-bulge 4mer	1235630	2980383	0.4146
+miR-371-373	N Average	N STD		+Empty vector	N Average	N STD														293-1C-bulge 4mer	1063796	2992993	0.3554
4-8C9G10C-B (293 WT)	0.481957	0.0584378		4-8C9G10C-B (293 WT)	0.91877	0.0840871														293-1C-bulge 4mer	1585444	4611571	0.3438
5-8C9G10C-B (293 MUT)	0.995689	0.0740783		5-8C9G10C-B (293 MUT)	0.894487	0.0725557														293-1,2C-bulge 4mer	1694797	2245985	0.7546
No site	1.02742	0.0462905		No site	0.961973	0.0560719														293-1,2C-bulge 4mer	3489727	3977566	0.8774
																				293-1,2C-bulge 4mer	2273086	2955957	0.769
					1	0.0833063														292-iso1-1C 4mer	1007867	2880126	0.3499
																				292-iso1-1C 4mer	1833100	2985278	0.614
																				292-iso1-1C 4mer	14819	4791093	0.0031
																				372-3p perfect	172401	2544684	0.0677
																				372-3p perfect	252492	3825140	0.066
																				372-3p perfect	300765	4074598	0.0738
																				No site	2281606	3248986	0.7023
																				No site	2408597	3556584	0.6772
																				No site	2360097	3173024	0.7438
																			Empty vector 1:100	293-1C-bulge 4mer	2087938	3134548	0.6661
																				293-1C-bulge 4mer	2965231	3971447	0.7466
																				293-1C-bulge 4mer	2628769	3751555	0.7007
																				293-1,2C-bulge 4mer	2767394	3883115	0.7127
																				293-1,2C-bulge 4mer	2374665	4237420	0.5604
																				293-1,2C-bulge 4mer	2147272	3437088	0.6247
																				292-iso1-1C 4mer	1400820	3081790	0.4545
																				292-iso1-1C 4mer	1546421	3880444	0.3985
																				292-iso1-1C 4mer	1815840	3566588	0.5091
																				372-3p perfect	2324042	3380241	0.6875
																				372-3p perfect	2067989	3095956	0.668
																				372-3p perfect	2716781	4325350	0.6281
																				No site	2163949	3301255	0.6555
																				No site	1733578	2644865	0.6555
																				No site	1814627	2691874	0.6741
