# Supplementary material for: Evolution of the miR-290–295/miR-371–373 Cluster Family Seed Repertoire
Source: PLoS One. 2014 Sep 30;9(9):e108519. doi: 10.1371/journal.pone.0108519 (PMC4182485; doi:10.1371/journal.pone.0108519)
Supplement: Table S1 — Sequences of the miRNA target sites used in this study. (XLSX) [file pone.0108519.s005.xlsx]

## Sheet: Table 1
	Code	Type	Corresponding miRNA	Target site sequence (in miRNA sense; underlined - pairing with miRNA)	Note
1	2-7C-S	Seed only tetramer	Mouse: miR-292-3p0	GGUACAAGUGCCCUGUCUCUCUGUCUGCCUGCU
2	2-7U-S	Seed only tetramer	Mouse: miR-291a-3p0, miR-294-3p0, miR-295-3p0 Human: miR-372-3p0, miR-373-3p0	GGUACAAGUGCUCUGUCUCUCUGUCUGCCUGCU
3	2-7G-S	Seed only tetramer	-	GGUACAAGUGCGCUGUCUCUCUGUCUGCCUGCU
4	2-7A-S	Seed only tetramer	-	GGUACAAGUGCACUGUCUCUCUGUCUGCCUGCU
5	2-7UU-S	Seed only tetramer	Mouse: miR-291a-3p0, miR-294-3p0 Human: miR-373-3p0	GGUACAAGUGCUUUGUCUCUCUGUCUGCCUGCU
6	3-7UU-S	Seed only tetramer	-	GGUACCAGUGCUUUGUCUCUCUGUCUGCCUGCU
7	2-7UA-S	Seed only tetramer	Mouse: miR-295-3p0	GGUACAAGUGCUAUGUCUCUCUGUCUGCCUGCU
8	3-7UA-S	Seed only tetramer	Mouse: miR-295-3p+1?	GGUACCAGUGCUAUGUCUCUCUGUCUGCCUGCU
9	2-7UG-S	Seed only tetramer	Mouse: miR-291a-3p0, miR-294-3p0, miR-295-3p0 Human: miR-372-3p0, miR-373-3p0	GGUACAAGUGCUGUGUCUCUCUGUCUGCCUGCU
10	3-7UG-S	Seed only tetramer	-	GGUACCAGUGCUGUGUCUCUCUGUCUGCCUGCU
11	2-7UC-S	Seed only tetramer	Mouse: miR-291a-3p0, miR-294-3p0, miR-295-3p0 Human: miR-372-3p0, miR-373-3p0	GGUACAAGUGCUCUGUCUCUCUGUCUGCCUGCU	Same as 2-7U-S
12	3-7UC-S	Seed only tetramer	-	GGUACCAGUGCUCUGUCUCUCUGUCUGCCUGCU
13	3-7C-S	Seed only tetramer	-	GGUACCAGUGCCCUGUCUCUCUGUCUGCCUGCU
14	4-7CGC-S	Seed only tetramer	Mouse: miR-293-3p+2	GGUACGUGCCGCGUGUCUCUCUGUCUGCCUGCU
15	5-7CGC-S	Seed only tetramer	-	GGUACCUGCCGCGUGUCUCUCUGUCUGCCUGCU
16	3-7CG-S	Seed only tetramer	Mouse: miR-292-3p+1	GGUACAGUGCCGGUGUCUCUCUGUCUGCCUGCU
17	4-7CG-S	Seed only tetramer	-	GGUACCGUGCCGGUGUCUCUCUGUCUGCCUGCU
18	4-7CGC-B	Bulge tetramer	Mouse: miR-293-3p+2	GGUACGUGCCGCUUGUUUGUAGUGUGCU
19	5-7CGC-B	Bulge tetramer	-	GGUACCUGCCGCUUGUUUGUAGUGUGCU
20	3-7CG-B	Bulge tetramer	Mouse: miR-292-3p+1	GGUACAGUGCCGUGUUUUUGAGUGUGCU
21	4-7CG-B	Bulge tetramer	-	GGUACCGUGCCGUGUUUUUGAGUGUGCU
23	290-5p-P	Perfect monomer	miR-290-5p	GGCCGGUACUCAAACUAUGGGGGCACUUUUUUUU
24	290-3p-P	Perfect monomer	miR-290-3p	GGCCUAAAAAGUGCCGCCUAGUUUUAAGCCCCGCC
25	291a-5p-P	Perfect monomer	miR-291a-5p	GGCCGGCCAUCAAAGUGGAGGCCCUCUCUUGA
26	291a-3p-P	Perfect monomer	miR-291a-3p	GGCCGAGAAAGUGCUUCCACUUUGUGUGCCACU
27	292-5p-P	Perfect monomer	miR-292-5p	GGCCGAUACUCAAACUGGGGGCUCUUUUGGAU
28	292-3p-P	Perfect monomer	miR-292-3p	GGCCAGAAAAGUGCCGCCAGGUUUUGAGUGUCACC
29	291b-5p-P	Perfect monomer	miR-291b-5p	GGCCGUCGAUCAAAGUGGAGGCCCUCUCCGCG
30	291b-3p-P	Perfect monomer	miR-291b-3p	GGCCGGGAAAGUGCAUCCAUUUUGUUUGUCUCU
31	293-5p-P	Perfect monomer	miR-293-5p	GGCCGGUACUCAAACUGUGUGACAUUUUGUU
32	293-3p-P	Perfect monomer	miR-293-3p	GGCCUAAGAAGUGCCGCAGAGUUUGUAGUGUUGCC
33	294-5p-P	Perfect monomer	miR-294-5p	GGCCCAUACUCAAAAUGGAGGCCCUAUCUAAG
34	294-3p-P	Perfect monomer	miR-294-3p	GGCCUGGAAAGUGCUUCCCUUUUGUGUGUUGCC
35	295-5p-P	Perfect monomer	miR-295-5p	GGCCGAGACUCAAAUGUGGGGCACACUUCUGG
36	295-3p-P	Perfect monomer	miR-295-3p	GGCCUAGAAAGUGCUACUACUUUUGAGUCUCUCC
37	371-5p-P	Perfect monomer	miR-371-5p	GGCCGGCACUCAAACUGUGGGGGCACUUUCUGCU
38	371-3p-P	Perfect monomer	miR-371-3p	GGCCGUGAAAGUGCCGCCAUCUUUUGAGUGUUACC
39	372-5p-P	Perfect monomer	miR-372-5p	GGCCGGGCCUCAAAUGUGGAGCACUAUUCUGA
40	372-3p-P	Perfect monomer	miR-372-3p	GGCCUGGAAAGUGCUUCCCUUUUGUGUGUUGCC
41	373-5p-P	Perfect monomer	miR-373-5p	GGCCGAUACUCAAAAUGGGGGCGCUUUCCUUU
42	373-3p-P	Perfect monomer	miR-373-3p	GGCCUGGGAAGUGCUUCGAUUUUGGGGUGUCCCU

## Sheet: Sheet1
	GGTACAAGTGCCCTGTCTCTCTGTCTGCCTGCT
	GGTACAAGTGCTCTGTCTCTCTGTCTGCCTGCT
	GGTACAAGTGCGCTGTCTCTCTGTCTGCCTGCT
	GGTACAAGTGCACTGTCTCTCTGTCTGCCTGCT
	GGTACAAGTGCTTTGTCTCTCTGTCTGCCTGCT
	GGTACCAGTGCTTTGTCTCTCTGTCTGCCTGCT
	GGTACAAGTGCTATGTCTCTCTGTCTGCCTGCT
	GGTACCAGTGCTATGTCTCTCTGTCTGCCTGCT
	GGTACAAGTGCTGTGTCTCTCTGTCTGCCTGCT
	GGTACCAGTGCTGTGTCTCTCTGTCTGCCTGCT
	GGTACAAGTGCTCTGTCTCTCTGTCTGCCTGCT
	GGTACCAGTGCTCTGTCTCTCTGTCTGCCTGCT
	GGTACCAGTGCCCTGTCTCTCTGTCTGCCTGCT
	GGTACGTGCCGCGTGTCTCTCTGTCTGCCTGCT
	GGTACCTGCCGCGTGTCTCTCTGTCTGCCTGCT
	GGTACAGTGCCGGTGTCTCTCTGTCTGCCTGCT
	GGTACCGTGCCGGTGTCTCTCTGTCTGCCTGCT
	GGTACGTGCCGCTTGTTTGTAGTGTGCT
	GGTACCTGCCGCTTGTTTGTAGTGTGCT
	GGTACAGTGCCGTGTTTTTGAGTGTGCT
	GGTACCGTGCCGTGTTTTTGAGTGTGCT
	GGCCGGTACTCAAACTATGGGGGCACTTTTTTTT
	GGCCTAAAAAGTGCCGCCTAGTTTTAAGCCCCGCC
	GGCCGGCCATCAAAGTGGAGGCCCTCTCTTGA
	GGCCGAGAAAGTGCTTCCACTTTGTGTGCCACT
	GGCCGATACTCAAACTGGGGGCTCTTTTGGAT
	GGCCAGAAAAGTGCCGCCAGGTTTTGAGTGTCACC
	GGCCGTCGATCAAAGTGGAGGCCCTCTCCGCG
	GGCCGGGAAAGTGCATCCATTTTGTTTGTCTCT
	GGCCGGTACTCAAACTGTGTGACATTTTGTT
	GGCCTAAGAAGTGCCGCAGAGTTTGTAGTGTTGCC
	GGCCCATACTCAAAATGGAGGCCCTATCTAAG
	GGCCTGGAAAGTGCTTCCCTTTTGTGTGTTGCC
	GGCCTAGAAAGTGCTACTACTTTTGAGTCTCTCC
	GGCCGAGACTCAAATGTGGGGCACACTTCTGG
